# Supplementary material for: Sensitivity of a leaf gas-exchange model for estimating paleoatmospheric CO 2 concentration
Source: Copernicus journal article supplement (doi:10.5194/cp-2018-156), 2018-11-21

**We thank the reviewers for their helpful reviews; the manuscript is stronger because of them. The comments are below, followed (in bold) our responses. All line numbers by us reference the marked-up copy of the revised manuscript.**

*REVIEWER #1*

General comments: Fossil leaf gas-exchange based CO<sub>2</sub> models are currently going through the “rigorous testing” phase and as the authors of this paper point out, this mechanistically, rather than empirically calibrated proxy, shows considerable promise. It is therefore of high relevance that studies, such as this one, are presented that provide quantification of potential confounding factors. In this case, the authors test three potential confounding factors (photorespiration, leaf temperature and canopy position) and provide quantifications on how these factors influence final CO<sub>2</sub> estimates. They are capable of eliminating two of these factors as insignificantly affecting CO<sub>2</sub> estimates (photorespiration and leaf temperature). The third factor, canopy position, is determined to strongly skew CO<sub>2</sub> estimates, but the authors point out that it is possible to identify leaves that grew in lower canopy positions, based on leaf micromorphology and an uncharacteristically wide  $\delta^{13}\text{C}$  range. This paper is a relevant contribution towards quantification of the potential error in fossil leaf gas-exchange based CO<sub>2</sub> models, and apart from minor suggested amendments, I have no problem with seeing this study being published.

Specific comments: In the materials and methods section, the authors lay out the specific ways that they are testing modern plants for potential bias in reconstructed CO<sub>2</sub>. In the appendix all the specific plants are listed with their input values and reconstructed CO<sub>2</sub>. However, from reading the methods section I get the impression that not each plant is being tested for the same potential confounding variable (photorespiration, leaf temperature and canopy position). It would be very helpful if there was a table that outlines specifically which plants were tested for what, or at least that this was made clear in the appendix, because in the main body of text it is hard to follow.

**We now include this information in column E of the supplemental table.**

In several places in the manuscript, including the abstract, it is mentioned that the random error propagation of the Franks et al. gas exchange model is better than uncertainty estimates of other leading paleo-CO<sub>2</sub> proxies. It would be very helpful for the untrained reader to see some proof of this statement in the form of a table that lists 1) the different CO<sub>2</sub> proxies, 2) a method of error quantification, 3) the actual amount of uncertainty in those CO<sub>2</sub> proxies and 4) the references to the case studies where this was tested. Such a table would lend credibility to the statement that gas-exchange models are quantifiably better than other CO<sub>2</sub> proxies.

**There are of course two elements of uncertainty: precision (spread of possible solutions) and accuracy (comparison to true answer; can only be quantified for times when CO<sub>2</sub> has been measured). The abstract brings up the theme of accuracy (28% mean error rate). In the main text (section 3.1), the mean error rate is compared generally to that in other CO<sub>2</sub> proxies by referencing the summary work of Franks et al. (2014).**

**The error propagation scheme noted by the reviewer is related to precision. We only mention precision in the Introduction by referencing what others have found (Franks et al., 2014). It is not a focal point of the current study.**

**The reviewer may (also) be referencing the paragraph in the Introduction where we argue that studies using other stomatal-based proxies probably overstate the accuracy and precision of their CO<sub>2</sub> estimates (lines 98-106). Our arguments here are conceptual only—there are no data we can summarize in a table, unfortunately. The point we are trying to make is that the reported accuracies and precisions associated with these other methods—when applied to plants living today (not fossils)—are better than what we find with gas-exchange methods. But this is partly because these other methods are based on empirical calibrations with...present-day plants. So excellent accuracies and precisions are not particularly surprising. But when you apply these other methods to fossils that are millions of years old, the present-day empirical calibrations are likely less appropriate.**

Final specific comment is on the title itself, for which I would like to suggest that the authors include what specifically is being tested. I.e. “Sensitivity of . . . CO<sub>2</sub> concentration to x, y & z”. There are other variables that the model is sensitive to and I believe the title would be more informative if the specifics were included.

**The largest block of data (40 species) is “general” testing, that is, estimating CO<sub>2</sub> from field-grown trees without isolating any single confounding factor (summarized in Figure 2). Thus, it would not be fully representative to say that we were only testing the model for the influence of canopy position, temperature, and photorespiration.**

Technical corrections: I could not find any spelling or styling errors in the manuscript. The paper is very well constructed and easy to follow.

---

## REVIEWER #2

The authors present a sensitivity analysis of a mechanistic model (Franks model) to predict paleoatmospheric CO<sub>2</sub>. They explore several specific areas; the effect of  $g_c(\text{op})/g_c(\text{max})$ , A0, temperature, photorespiration and leaf canopy position on the accuracy of CO<sub>2</sub> estimates produced by the model. In doing so, the paper adds clarity, certainty or recommendations to the model for fossil application, all of which are important additions, especially as this model is being used in a growing number of research projects. Although the paper is an important contribution, it would benefit from clarity or expansion in certain areas:

1) Aims, methods and appendix: The aims and methods section is hard to follow. This may be due to the fact the aims and rationale are mixed in with the methods. It is unclear from the text or appendix data whether all or a subset of the data is being used for each of the analysis performed. A summarised table in the methods section containing the information on the analysis being performed, data source and parameters used or tested would be beneficial (i.e. a summary of the methods in tabular format). Similarly, in the appendix, additional information on the origin of the data, sample number per species, which data points/values are measured vs estimated/assumed and a direct comparison of measured vs model estimated CO<sub>2</sub> would greatly improve clarity.

**We now present a tabular summary of our study design (new Table 1).**

**In the Supplemental Table 1, we now give the sample size (column F), the target (i.e., correct) CO<sub>2</sub> concentration (column G), and whether the input was measured or inferred (color coding of column headers). And column E gives what part of the study was addressed (general testing, temperature, or canopy position; reviewer #1 also asked for this information). We are not sure what is meant by “additional information on the origin of the data” beyond what is listed in column A and stated in the main-text Methods.**

2) Statistical analysis: Accuracy was evaluated by the degree of error rate. These claims can be strengthened by using statistical analysis. How well the model predicts CO<sub>2</sub> could be assessed by whether or not the estimates are statistically significant different (or hopefully not) from measured CO<sub>2</sub> values.

**We have added information about whether individual estimates depart from the target CO<sub>2</sub> concentrations (lines 344-346 and 419-421).**

3)  $g_c(\text{op})/g_c(\text{max})$  and A0 (section 3.1): This section gives details about when both  $g_c(\text{op})/g_c(\text{max})$  and A0 values are either known or values from Franks et al. 2014 are used, but it would be nice to see these two parameters evaluated separately i.e. how much does  $g_c(\text{op})/g_c(\text{max})$  alone improve estimates and the same for A0. Does one contribute more than the other for improving error rates?

**We have added this information (lines 351-352).**

Additional comments:

Line 86. Sensitivity saturates for some but not all taxa. See Haworth et al 2011.

**We have added the qualifier “in many species”.**

Line 93. A Nearest living relative or equivalent approach also get around the issue of extinct taxa.

**This is true for the stomatal ratio method, but these CO<sub>2</sub> estimates are not meant to be quantitative in the same manner as estimates from the “full calibration” methods or the gas-exchange methods (as noted in the previous paragraph).**

Line 156. Alternative approaches for fossils have been suggested such as estimating fossil A<sub>0</sub> using scaling relationships between vein distance and assimilation rate however they are not discussed here (EG Montanez et al., 2016).

**We have added a citation to the Montanez paper**

Introduction – general comment. Critical published assessments of the Franks model are not cited (eg McElwain et al. 2016) yet they raise issues associated with parametrization of A<sub>0</sub> and the insensitivity of CO<sub>2</sub> estimates to variation in gamma star values which are both important discussion points in this manuscript in lines 454 -456 and 497-499.

**As per a later comment, we have added a citation to McElwain et al. 2016 regarding gamma star on line 466.**

**Our study does not focus on the parameterization of A<sub>0</sub>, and so the associated literature does not seem relevant to the Introduction. Our study focuses on temperature, photorespiration, canopy position, as well as a general and broad test of the method.**

Paragraph 201-217: A some information is missing here: chamber model/make, duration plants were grown in the chamber, light levels. What were measured vs set chamber conditions for temperature, light and CO<sub>2</sub> (i.e. similar to how humidity is reported)

**Chamber make/model (lines 212-213) and duration of experiment (line 229) are given. We have added information about light intensity as well as the standard deviations for temperature and CO<sub>2</sub> concentrations in lines 213-218.**

Lines 232: Stomatal density/stomatal measurements and leaf stable carbon isotopes were performed on the same leaves. Clarify how this was partitioned, e.g. was the leaf divided into 2 or was a whole punch used for carbon isotopes, etc.?

**We now clarify our methodology in lines 237-238. We used either a hole punch or razor to remove two adjacent sections of leaf tissue near the leaf centers, avoiding major veins.**

Lines 235: As Milligan et al is in review, I suggest adding more detail here on how  $\delta^{13}\text{C}$  of chamber  $\text{CO}_2$  was calculated.  $\delta^{13}\text{C}$  values of supplemented  $\text{CO}_2$  can be very negative and can vary between cylinders, unless the  $\text{CO}_2$  gas has a specific  $\delta^{13}\text{C}$ . What is the capacity of these cylinder, in L?

**This paper is likely to be “in press” soon; we have appended it to the end of this file (after the marked-up copy of our manuscript). In short, a mixing line was established based on direct  $\delta^{13}\text{C}$  measurements of lab air, chamber air, and cylinder  $\text{CO}_2$  (= pure  $\text{CO}_2$ ). We were fortunate that the  $\delta^{13}\text{C}$  of the cylinder was close to the well-mixed atmosphere (the  $\delta^{13}\text{C}$  in most cylinders we have used in other experiments is much more depleted). We used only the single cylinder for the duration of the experiment. The target  $\text{CO}_2$  concentration (500 ppm) was not much higher than the  $\text{CO}_2$  concentration inside the lab (~440 ppm), so we did not use much  $\text{CO}_2$ .**

Figure 1: Does this need to be on a log scale? 1000 or 2000ppm are not very high values and the log scale visually skews data and error bars. A difference plot between measured and estimates plotted on a non-log scale would improve this figure.

**We prefer a log scale because it is easier to differentiate estimates at the low-end of the  $\text{CO}_2$  scale, and because the uncertainties scale in a logarithmic fashion.**

Line 351: Please provide supporting data for this statement in tabular form. What are the error rates of other proxies?

**This information was summarized by Franks et al. (2014), so we prefer not to repeat it here.**

Line 355: Might be helpful to report standard deviation of  $\text{CO}_2$  estimates, here and throughout the text.

**We now report the range that encompasses two-thirds of all estimates (lines 343-344). (Because the individual estimates are not normally distributed (tail at the high end), reporting a standard deviation can be misleading.)**

Line 411 to 413. Reporting of the difference between estimated and measured  $\text{CO}_2$  here is incomplete. Only means of all species investigated are provided rather than species-based differences or errors. For some species the error is substantial whereas other taxa show very small errors.

**As per an earlier comment, we now report the species-level differences on lines 419-421; no individual species-level test was significant (line 408).**

Line 454 to 456. This supports the findings of McElwain et al 2016 Paleo 3 but it is not cited. “This compensation point ( $\Gamma^*$  in Eq. (2) is temperature, species and  $\text{O}_2$  dependent (Ethier and Livingston, 2004) but Franks et al. (2014) account only for the temperature dependency in the new paleo- $\text{CO}_2$  proxy model. Allowing  $\Gamma^*$  to vary in response to prevailing paleoatmospheric  $\text{O}_2$  concentration [ $\text{O}_2$ ] ( $\Gamma^* = 1.78 \times [\text{O}_2]$ ), which is known to have varied widely (10% to 30%) through the Phanerozoic (Bergman et al., 2004; Belcher and McElwain, 2008; Berner, 2009), would increase the precision of paleo- $\text{CO}_2$  estimates but only fractionally.”

**We have added a citation to McElwain et al. (2016 Palaeo3) (line 466).**

Lines 500 to 506: A number of papers have suggested methods of estimating  $A_0$  to improve the accuracy of  $CO_2$  estimates using the Franks model but they are not discussed. This section would provide a good opportunity to discuss the proposed ideas and solutions.

**This section deals with living leaves, where  $A$  could be measured directly. Measuring  $A$  wasn't part of our study design, unfortunately. In this section we are discussing possible reasons for noise in our mixing-model calculations. With regards to fossils, we are not recommending that our mixing model be used (line 520: "We note that our mixing-model strategy cannot be applied to fossils because..."), so the question of how to constrain  $A$  in fossils within the context of the mixing model is moot. Our take-home message for fossil applications is to avoid shade leaves (line 528), and we provide specific measurements that can be made on fossils to make this distinction, including vein density (lines 529-533).**

Section 3.4: Have any values for  $\delta^{13}Ca$  been measured or are all calculated for this section? Is there any data set (from the literature or otherwise) this could be compared to? i.e. a dataset where known  $\delta^{13}Ca$  is compared to itself when calculated as per the manuscript? This would strengthen this section. If  $\delta^{13}Ca$  has only been calculated/inferred for this section without a comparison to measured  $\delta^{13}Ca$  I think claims on the effect of  $\delta^{13}Ca$  (or low canopy plants) on the model should be softened.

**We made no direct measurements of understory  $d^{13}Ca$  (multiple measurements over a growing season, and at different daytime hours, would be needed to calculate a representative mean value). As the reviewer correctly notes, we instead are assuming a well-behaved two end-member mixing model. We have added a note of caution related to this on lines 502-505.**

Appendix: The authors used both known and general values for  $g_c(op)/g_c(max)$  and  $A_0$  to evaluate error rates but no measured values of either  $g_c(op)/g_c(max)$  or  $A_0$  are given in the appendix or text.

**The Appendix summarizes all new data presented in the study (with the key graphics being Figures 2, 5, and 7). For these data, we \*only\* used "default" values of  $g_{op}/g_{max}$  and  $A_0$ ; that is, we did not measure these inputs on our leaves. As noted in the Introduction, this was a purposeful strategy because we wanted to test the  $CO_2$  model in a manner that would be similar to how most (but not all) folks will be applying the model to fossils. A "worst-case" test, if you will.**

In the Introduction, we do summarize some of the already-published data (Figure 1). For these estimates, either  $g_{op}/g_{max}$  or  $A_0$  were measured, and in most cases both were measured (lines 142-145). These data are not in the Appendix because they are already published and are not central to our study.

**As the reviewer noted, we did additionally "degrade" these estimates by re-doing them assuming default values for  $g_{op}/g_{max}$  and  $A_0$ . We did this so we could compare them more directly to our estimates (lines 349-351).**

# Sensitivity of a leaf gas-exchange model for estimating paleoatmospheric CO<sub>2</sub> concentration

Dana L. Royer<sup>1</sup>, Kylene M. Moynihan<sup>1</sup>, Melissa L. McKee<sup>1</sup>, Liliana Londoño<sup>2</sup>, and Peter J. Franks<sup>3</sup>

<sup>1</sup>Department of Earth and Environmental Sciences, Wesleyan University, Middletown, Connecticut, USA

<sup>2</sup>Smithsonian Tropical Research Institute, Balboa, Ancón, Republic of Panamá

<sup>3</sup>Faculty of Agriculture and Environment, University of Sydney, Sydney, New South Wales, Australia

**Correspondence:** Dana L. Royer (droyer@wesleyan.edu)

**Abstract.** Leaf gas-exchange models show considerable promise as paleo-CO<sub>2</sub> proxies. They are largely mechanistic in nature, provide well-constrained estimates even when CO<sub>2</sub> is high, and can be applied to most subaerial, stomata-bearing leaves from C<sub>3</sub> taxa, regardless of age or taxonomy. Here we place additional observational and theoretical constraints on one of these models, the “Franks” model. In order to gauge the model’s general accuracy in a way that is appropriate for fossil studies, we estimated CO<sub>2</sub> from 40 species of extant angiosperms, conifers, and ferns based only on measurements that can be made directly from fossils (leaf δ<sup>13</sup>C and stomatal density and size) and a limited sample size (1-3 leaves per species). The mean error rate is 28%, which is similar to or better than the accuracy of other leading paleo-CO<sub>2</sub> proxies. We find that leaf temperature and photorespiration do not strongly affect estimated CO<sub>2</sub>, although more work is warranted on the possible influence of O<sub>2</sub> concentration on photorespiration. Leaves from the lowermost 1-2 m of closed-canopy forests should not be used because the local air δ<sup>13</sup>C value is lower than the global well-mixed value. Such leaves are not common in the fossil record, but can be identified by morphological and isotopic means.

## 1 Introduction

Leaves on terrestrial plants are well poised to record information about the concentration of atmospheric CO<sub>2</sub>. They are in direct contact with the atmosphere and have large surface-area-to-volume ratios, so the leaf internal CO<sub>2</sub> concentration is tightly coupled to atmospheric CO<sub>2</sub> concentration. Also, leaves are specifically built for the purpose of fixing atmospheric carbon into structural tissue, and face constant selection pressure to optimize their carbon uptake relative to water loss. As a result, many components of the leaf system are sensitive to atmospheric CO<sub>2</sub>, and these components feedback on one another to reach a new equilibrium when atmospheric CO<sub>2</sub> changes. In terms of carbon assimilation, Farquhar and Sharkey (1982) modeled this system in its simplest form as:

$$A_n = g_{c(tot)} \times (c_a - c_i), \quad (1)$$

where  $A_n$  is the leaf CO<sub>2</sub> assimilation rate ( $\mu\text{mol m}^{-2} \text{s}^{-1}$ ),  $g_{c(tot)}$  is the total operational conductance to CO<sub>2</sub> diffusion from the atmosphere to site of photosynthesis ( $\text{mol m}^{-2} \text{s}^{-1}$ ),  $c_a$  is atmospheric CO<sub>2</sub> concentration ( $\mu\text{mol mol}^{-1}$  or ppm), and  $c_i$  is leaf intercellular CO<sub>2</sub> concentration ( $\mu\text{mol mol}^{-1}$  or ppm) (see also Von Caemmerer, 2000).

Rearranging Eq. (1) for atmospheric CO<sub>2</sub> yields:

$$c_a = \frac{A_n}{g_{c(tot)} \times \left(1 - \frac{c_i}{c_a}\right)}. \quad (2)$$

47 Equation (2) forms the basis of two leaf gas-exchange approaches for estimating paleo-CO<sub>2</sub> from fossils  
 48 (Konrad et al., 2008, 2017; Franks et al., 2014). In the Franks model, conductance is estimated in part  
 49 from measurements of stomatal size and density,  $c_i/c_a$  from measurements of leaf  $\delta^{13}\text{C}$  along with  
 50 reconstructions of coeval air  $\delta^{13}\text{C}$  (see also Eq. 9), and  $A_n$  from knowledge of living relatives and its  
 51 dependency on  $c_a$  (Franks et al., 2014). Following Farquhar et al. (1980), the latter is modeled as (Franks  
 52 et al., 2014; Kowalczyk et al., 2018):

$$54 \quad A_n = A_0 \frac{[(\frac{c_i}{c_a})c_a - \Gamma^*][(\frac{c_{i0}}{c_{a0}})c_{a0} + 2\Gamma^*]}{[(\frac{c_i}{c_a})c_a + 2\Gamma^*][(\frac{c_{i0}}{c_{a0}})c_{a0} - \Gamma^*]}, \quad (3)$$

55  
 56 where  $\Gamma^*$  is the CO<sub>2</sub> compensation point in the absence of dark respiration (ppm) and the subscript “0”  
 57 refers to conditions at a known CO<sub>2</sub> concentration (typically present-day). Equations (2) and (3) are then  
 58 solved iteratively until the solution for  $c_a$  converges.

59 These gas-exchange approaches grew out of a group of paleo-CO<sub>2</sub> proxies based on the CO<sub>2</sub>  
 60 sensitivity of stomatal density ( $D$ ) or the similar metric stomatal index (Woodward, 1987; Royer, 2001).  
 61 Here, the  $D$ - $c_a$  sensitivity is calibrated in an extant species, allowing paleo-CO<sub>2</sub> inference from the same  
 62 (or very similar) fossil species. These empirical relationships typically follow a power-law function  
 63 (Wynn, 2003; Franks et al., 2014; Konrad et al., 2017):

$$64 \quad c_a = \frac{1}{kD^\alpha}, \quad (4)$$

65  
 66 where  $k$  and  $\alpha$  are species-specific constants.

67 The related stomatal ratio proxy is simplified:  $D$  is measured in an extant species ( $D_0$ , at present-  
 68 day  $c_{a0}$ ) and then the ratio of  $D_0$  to  $D$  in a related fossil species is assumed to be linearly related to the  
 69 ratio of paleo- $c_a$  to present-day  $c_{a0}$  (Chaloner and McElwain, 1997; McElwain, 1998):

$$70 \quad \frac{c_a}{c_{a0}} = k \frac{D_0}{D}. \quad (5)$$

71  
 72 Equation (5) can be rearranged to match Eq. (4) but with  $\alpha$  fixed at 1. Thus, paleo-CO<sub>2</sub> estimates using  
 73 the stomatal ratio proxy are based on a one-point calibration and an assumption that  $\alpha = 1$ ;  
 74 observations do not always support this assumption (e.g.,  $\alpha = 0.43$  for *Ginkgo biloba*; Barclay and Wing,  
 75 2016). The scalar  $k$  was originally set at 2 for Paleozoic and Mesozoic reconstructions so that paleo-CO<sub>2</sub>  
 76 estimates during the Carboniferous matched that from long-term carbon cycle models (Chaloner and  
 77 McElwain, 1997). For younger reconstructions,  $k$  is probably closer to 1 (by definition,  $k = 1$  for present-  
 78 day plants). We note that the stomatal ratio proxy was originally conceived as providing qualitative  
 79 information, only, about paleo-CO<sub>2</sub> (McElwain and Chaloner, 1995, 1996; Chaloner and McElwain, 1997;  
 80 McElwain, 1998) and has not been tested with dated herbaria materials or with CO<sub>2</sub> manipulation  
 81 experiments.

82  
 83 At high CO<sub>2</sub>, the  $D$ - $c_a$  sensitivity saturates in many species, leading to uncertain paleo-CO<sub>2</sub>  
 84 estimates, often with unbounded upper limits (e.g., Smith et al., 2010; Doria et al., 2011). Stomatal  
 85 density does not respond to CO<sub>2</sub> in all species (Woodward and Kelly, 1995; Royer, 2001), and because  $D$ -  
 86  $c_a$  relationships can be species-specific (that is, different species in the same genus with different  
 87 responses; Beerling, 2005; Haworth et al., 2010), only fossil taxa that are still alive today should be used.  
 88 The gas-exchange proxies partly address these limitations: 1) CO<sub>2</sub> estimates remain well-bounded—even  
 89 at high CO<sub>2</sub>—and their precision is similar to or better than other leading paleo-CO<sub>2</sub> proxies (~+35/-25%  
 90 at 95% confidence; Franks et al., 2014); 2) the models are mostly mechanistic; that is, they are explicitly



driven by plant physiological principles, not just empirical relationships measured on living plants; 3) because the models retain sensitivity at high CO<sub>2</sub> and do not require that a fossil species still be alive today, much of the paleobotanical record is open for CO<sub>2</sub> inference, regardless of age or taxonomy; and 4) because the models are based on multiple inputs linked by feedbacks, they can still perform adequately even if one or more of the inputs in a particular taxon is not sensitive to CO<sub>2</sub>, for example stomatal density (Milligan et al., in review).

We note that the published uncertainties (= precision) associated with the stomatal density proxies are probably too small because they usually only reflect uncertainty in the calibration regression or in the measured values of fossil stomatal density, but not both; when this is done, errors often exceed ±30% at 95% confidence (Beerling et al., 2009). Also, error rates in estimates from extant taxa where CO<sub>2</sub> is known (= accuracy) are usually smaller with the stomatal density proxies (e.g., Barclay and Wing, 2016), but this is expected because the same taxa have been calibrated in present-day (or near present-day) conditions. Because the gas-exchange proxies are largely built from physiological principles, they have less “recency” bias; that is, the gas-exchange proxies estimate present-day and paleo-CO<sub>2</sub> with similar certainty when the same methods are used to determine the inputs.

## 2 Study Aims and Methods

Leaf gas-exchange proxies for paleo-CO<sub>2</sub> are becoming popular (Konrad et al., 2008, 2017; Grein et al., 2011a, 2011b, 2013; Erdei et al., 2012; Roth-Nebelsick et al., 2012, 2014; Franks et al., 2014; Maxbauer et al., 2014; Montañez et al., 2016; Reichgelt et al., 2016; Tesfamichael et al., 2017; Kowalczyk et al., 2018; Lei et al., 2018; Londoño et al., 2018; Richey et al., 2018; Milligan et al., in review). However, many elements of these models remain understudied. Here we investigate four such elements for the Franks et al. (2014) model: how does the model perform across a large number of phylogenetically diverse taxa; and how is the model affected by temperature, photorespiration, and proximity to the forest floor? We describe next the motivation and details of the study design ([see also Table 1 for summary](#)).

**Table 1. Summary of data sets.**

| <u>Factor tested</u>                                                                                                         | <u>Number of species</u> | <u>Methods section</u> | <u>Notes</u>                                                                                     |
|------------------------------------------------------------------------------------------------------------------------------|--------------------------|------------------------|--------------------------------------------------------------------------------------------------|
| <u>General testing in a phylogenetically diverse set of species and with a minimal number of leaves measured per species</u> | <u>40</u>                | <u>2.1</u>             | <u>Leaves come from Panama (published by Londoño et al., 2018), Connecticut, and Puerto Rico</u> |
| <u>Temperature</u>                                                                                                           | <u>6</u>                 | <u>2.2</u>             | <u>Theoretical calculations and growth chamber experiment</u>                                    |
| <u>Photorespiration</u>                                                                                                      | <u>NA</u>                | <u>2.3</u>             | <u>Theoretical calculations</u>                                                                  |
| <u>Canopy position</u>                                                                                                       | <u>6</u>                 | <u>2.4</u>             | <u>Leaves come from Panama and Connecticut</u>                                                   |

### 2.1 General testing in living plants

Franks et al. (2014) tested the model on four species of field-grown trees (three gymnosperms and one angiosperm) and one conifer grown in chambers at 480 and 1270 ppm CO<sub>2</sub>. The average error rate (absolute value of estimated CO<sub>2</sub> minus measured CO<sub>2</sub>, divided by measured CO<sub>2</sub>) was 5%. Follow-up work with three field-grown tree species (Maxbauer et al., 2014; Kowalczyk et al., 2018), CO<sub>2</sub>

130 experiments on seven tropical trees species (Londoño et al., 2018), and experiments on two fern and  
 131 one conifer species (Milligan et al., in review) indicate somewhat higher error rates (Fig. 1). Combined,  
 132 the average error rate is 20% (median = 13%).

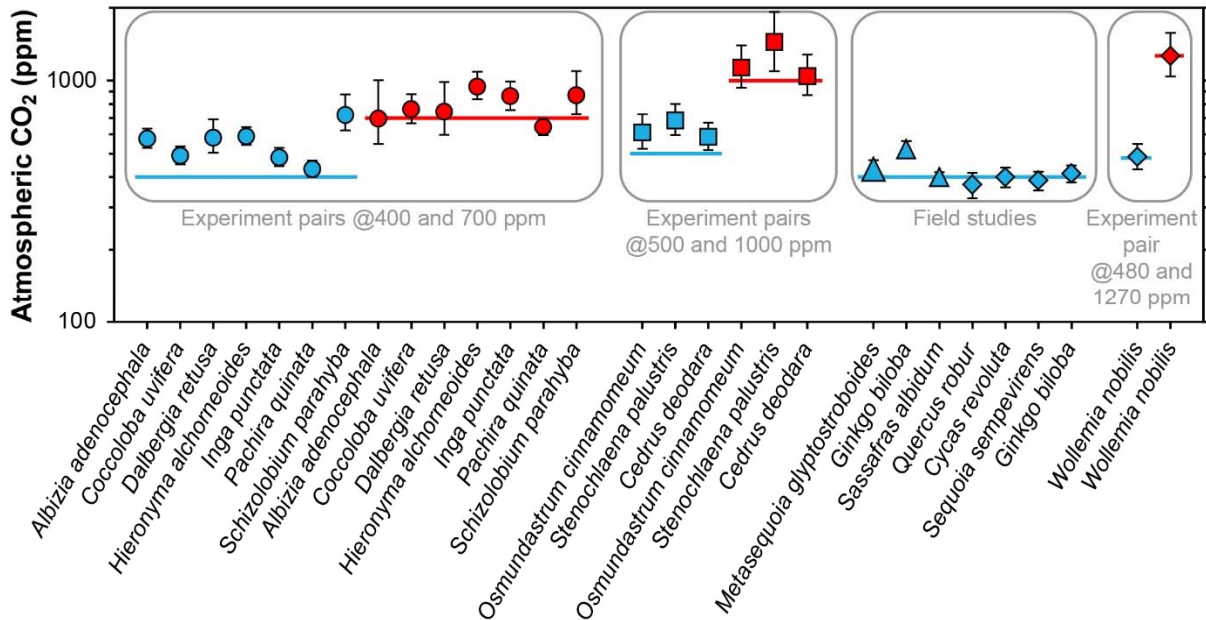

133  
 134 **Figure 1.** Published CO<sub>2</sub> estimates using the Franks model for extant plants where the physiological  
 135 inputs  $A_0$  (assimilation rate at a known CO<sub>2</sub> concentration) and/or  $g_{c(op)}/g_{c(max)}$  (ratio of operational to  
 136 maximum leaf conductance to CO<sub>2</sub>) were measured directly. Horizontal lines are the correct CO<sub>2</sub>  
 137 concentrations. Uncertainties in the estimates correspond to the 16<sup>th</sup>-84<sup>th</sup> percentile range. Circles are  
 138 from Londoño et al. (2018), squares from Milligan et al. (in review), large triangle from Maxbauer et al.  
 139 (2014), small triangles from Kowalczyk et al. (2018), and diamonds from Franks et al. (2014).

140  
 141  
 142 In these studies, two of the key physiological inputs were measured directly with an infrared gas  
 143 analyzer: the assimilation rate at a known CO<sub>2</sub> concentration ( $A_0$ ) and/or the ratio of operational to  
 144 maximum stomatal conductance to CO<sub>2</sub> ( $g_{c(op)}/g_{c(max)}$ ), or  $\zeta$ , the latter of which is important for  
 145 calculating the total leaf conductance ( $g_{c(tot)}$ ). These two inputs cannot be directly measured on fossils;  
 146 thus, the error rates associated with Figure 1 may not be representative for fossil studies. Franks et al.  
 147 (2014) argue that within plant functional types growing in their natural environment, mean  $A_0$  is fairly  
 148 conservative, leading to the recommended mean  $A_0$  values in Franks et al. (2014) ( $12 \mu\text{mol m}^{-2} \text{s}^{-1}$  for  
 149 angiosperms, 10 for conifers, and 6 for ferns and ginkgos). Along similar lines, the mean ratio  $g_{c(op)}/g_{c(max)}$   
 150 tends to be conserved across plant functional types; Franks et al. (2014) recommend a value of 0.2,  
 151 which may correspond to the most efficient setpoint for stomata to control conductance (Franks et al.,  
 152 2012). This conservation of physiological function is one of the underlying principles in the Franks  
 153 model.

154 Here we test this assumption by estimating CO<sub>2</sub> from 40 phylogenetically diverse species of  
 155 field-grown trees. In making these estimates, we use the recommended mean values of  $A_0$  and  
 156  $g_{c(op)}/g_{c(max)}$  from Franks et al. (2014) instead of measuring them directly (see also Montañez et al., 2016  
 157 for other ways to infer assimilation rate from fossils). Thus, this dataset should be a more faithful gauge  
 158 for model accuracy as applied to fossils. Of the 40 species, 21 were previously published in Londoño et

159 al. (2018), who collected sun-adapted canopy leaves of angiosperms using a crane in Parque Nacional  
 160 San Lorenzo, Panama. To test the method in temperate forests, we collected leaves from eleven  
 161 angiosperm and seven conifer species from Dinosaur State Park (Rocky Hill, Connecticut), Wesleyan  
 162 University (Middletown, Connecticut), and Connecticut College (New London, Connecticut) during the  
 163 summer of 2015. Here, all trees grew in open, park-like settings; one to three sun leaves were sampled  
 164 from the lower outside crown of each tree. In January of 2015, we also sampled sun-exposed leaves  
 165 from the tree fern *Cyathea arborea* in El Yunque National Forest, Puerto Rico (near the Yokahú Tower).

166 Stomatal size and density were measured either on untreated leaves using epifluorescence  
 167 microscopy with a 420-490 nm filter, or on cleared leaves (using 50% household bleach or 5% NaOH)  
 168 using transmitted-light microscopy. For most species, whole-leaf  $\delta^{13}\text{C}$  comes from Royer and Hren  
 169 (2017); the same leaves were measured for  $\delta^{13}\text{C}$  and stomatal morphology. The UC Davis Stable Isotope  
 170 Facility measured some additional leaf samples. Table S1 summarizes for these 40 species all of the  
 171 inputs needed to run the Franks model, along with the estimated  $\text{CO}_2$  concentrations. Uncertainties in  
 172 the estimates are based on error propagation using Monte Carlo simulations (Franks et al., 2014).

173

## 174 2.2 Temperature

175

176 The Franks model can be configured for any temperature. Franks et al. (2014) recommend that the  
 177 photosynthesis parameters  $A_0$  and  $\Gamma^*$ , and the air physical properties affecting diffusion of  $\text{CO}_2$  into the  
 178 leaf (the ratio of  $\text{CO}_2$  diffusivity in air to the molar volume of air, or  $d/v$ ) correspond with the mean  
 179 daytime growing-season leaf temperature (more precisely, assimilation-weighted leaf temperature). The  
 180 reasoning behind this is that (i) the assimilation-weighted leaf temperature will correspond with the  
 181 mean  $c_i/c_a$  derived from fossil leaf  $\delta^{13}\text{C}$ ; and (ii) both theory (Michaletz et al., 2015, 2016) and  
 182 observations (Helliker and Richter, 2008; Song et al., 2011) indicate that the control of leaf gas exchange  
 183 leads to relatively stable assimilation-weighted leaf temperatures ( $\sim 19\text{-}25^\circ\text{C}$  from temperate to tropical  
 184 regions) despite large differences in air temperature. This is mostly due to the effects of transpiration on  
 185 leaf energy balance. Franks et al. (2014) chose a fixed temperature of  $25^\circ\text{C}$  because much of the  
 186 Mesozoic and Cenozoic correspond to climates warmer than the present-day. When applying the Franks  
 187 model to known cooler paleoenvironments, improved accuracy may be achieved with leaf-temperature-  
 188 appropriate values for  $A_0$ ,  $\Gamma^*$ , and  $d/v$ .

189 Bernacchi et al. (2003) proposed the following temperature sensitivity for  $\Gamma^*$  based on  
 190 experiments:

191

$$192 \Gamma^* = e^{(19.02 - \frac{37.83}{RT})}, \quad (6)$$

193

194 where  $R$  is the molar gas constant ( $8.31446 \times 10^{-3} \text{ kJ K}^{-1} \text{ mol}^{-1}$ ) and  $T$  is leaf temperature (K). Marrero and  
 195 Mason (1972) describe the sensitivity of water vapor diffusivity to temperature as:

196

$$197 d = 1.87 \times 10^{-10} \left( \frac{T^{2.072}}{P} \right), \quad (7)$$

198

199 where  $P$  is atmospheric pressure, which we fix at 1 atmosphere. Lastly, the temperature sensitivity of  
 200 the molar volume of air follows ideal gas principles:

201

$$202 v = v_{STP} \left( \frac{T}{T_{STP}} \right) \left( \frac{P}{P_{STP}} \right), \quad (8)$$

203

204 where  $T_{STP}$  is 273.15 K,  $P_{STP}$  is 1 atmosphere, and  $v_{STP}$  is the air volume at  $T_{STP}$  and  $P_{STP}$  (0.022414 m<sup>3</sup> mol<sup>-1</sup>).  
205

206 Using Eqs. (6-8), we can describe how, conceptually, the sensitivities of  $\Gamma^*$  and  $d/v$  to leaf  
207 temperature affect estimates of CO<sub>2</sub> from the Franks model. We apply these relationships to a suite of  
208 409 fossil and extant leaves from 62 species of angiosperms, gymnosperms, and ferns. These data come  
209 from the current study (see Sect. 2.1 and 2.4) and Londoño et al. (2018), Kowalczyk et al. (2018), and  
210 Milligan et al. (in review).

211 To experimentally test more generally how the Franks model is influenced by temperature, we  
212 grew six species of plants inside two growth chambers with contrasting temperatures (Conviron E7/2;  
213 Winnipeg, Canada). Air temperature was  $28 \pm 0.5$  °C (10) and  $20 \pm 0.3$  °C during the day, and  $19 \pm 0.7$  °C  
214 and  $11 \pm 1.1$  °C during the night. We note that the difference in leaf temperature was probably smaller  
215 than that in air temperature during the day (8 °C; see earlier discussion). We held fixed the day length  
216 (17 hours with a 30 minute simulated dawn and dusk) and CO<sub>2</sub> concentration ( $500 \pm 10$  ppm). Light  
217 intensity at the heights where we sampled leaves ranged from 100-400  $\mu\text{mol m}^{-2} \text{s}^{-1}$ . Humidity differed  
218 moderately between chambers ( $76.5 \pm 1.8\%$  ~~10~~ and  $90.0 \pm 3.6\%$ ). To minimize any chamber effects, we  
219 alternated plants between chambers every two weeks.

220 Four of the species started as saplings purchased from commercial nurseries: bare-root, one-  
221 foot tall saplings of *Acer negundo* and *Carpinus caroliniana*, one-foot tall saplings of *Ostrya virginiana*  
222 with a soil ball, and bare-root, four-inch tall saplings of *Ilex opaca*. We grew the other two species from  
223 seed: *Betula lenta* from a commercial source, and *Quercus rubra* from a single tree on Wesleyan  
224 University's campus. All seeds were soaked in water for 24 hours and then cold stratified in a  
225 refrigerator for 30 and 60 days, respectively.

226 All seeds and saplings grew in the same potting soil (Promix Bx with Mycorise; Premier  
227 Horticulture; Quakertown, Pennsylvania, USA) and fertilizer (Scotts all-purpose flower and vegetable  
228 fertilizer; Maryville, Ohio, USA). They were watered to field capacity every other day, and we discarded  
229 any excess water passing through the pots. After three months of growth in the chambers, for each  
230 species-chamber pair we harvested the three newest fully expanded leaves whose buds developed  
231 during the experiment. In most cases, we harvested five plants per species-chamber pair; the one  
232 exception was *I. opaca*, where we were limited to three plants in the warm treatment and two in the  
233 cool treatment.

234 We measured stomatal size and density on cleared leaves (using 50% household bleach) with  
235 transmitted-light microscopy. Whole-leaf  $\delta^{13}\text{C}$  comes from the UC Davis Stable Isotope Facility and the  
236 Light Stable Isotope Mass Spec Lab at the University of Florida; the same leaves were measured for  $\delta^{13}\text{C}$   
237 and stomatal morphology. We used either a hole punch or razor to remove two adjacent sections of leaf  
238 tissue near the leaf centers, avoiding major veins. Because we used the same CO<sub>2</sub> gas cylinder as  
239 Milligan et al. (in review), we used their two-end-member mixing model to calculate the  $\delta^{13}\text{C}$  of the  
240 chamber CO<sub>2</sub> at 500 ppm (-10.6 ‰). We used the recommended values from Franks et al. (2014) for the  
241 physiological inputs  $A_0$  and  $g_{c(op)}/g_{c(max)}$ . Table S1 summarizes all of the inputs from this experiment  
242 needed to run the Franks model, along with the estimated CO<sub>2</sub> concentrations. The standard errors for  
243 the inputs are based on plant means.

244 To test if leaf  $\delta^{13}\text{C}$  and stomatal morphology (stomatal density, stomatal pore length, and single  
245 guard cell width) differed between temperature treatments across species, we implemented a mixed  
246 model in R (R Core Team, 2016) using the lme4 (Bates et al., 2015) and lmerTest (Kuznetsova et al.,  
247 2017) packages, with temperature and species as the two fixed factors. To test if there was a significant  
248 difference between CO<sub>2</sub> estimates from the two temperature treatments, we ran a Kolmogorov–  
249 Smirnov (KS) test in R. For each species, we first estimated CO<sub>2</sub> for each plant in the warm and cool  
250 treatments based on simulated inputs constrained by their means and variances. In the typical case with  
251 five plants per chamber, this produced five CO<sub>2</sub> estimates for the warm chamber and the same for the

252 cool chamber. A KS test was then used to test for a significant temperature effect. We repeated this  
253 procedure 10,000 times, with 10,000 associated KS tests. The fraction of tests with a p-value < 0.05 was  
254 taken as the overall p value. An advantage of this approach is that it incorporates both within- and  
255 across-plant variation.

256  
257

### 258 2.3 Photorespiration

259

260  $c_i/c_a$  is estimated in the Franks model following Farquhar et al. (1982):

261

$$262 \Delta_{leaf} = a + (b - a) \times \frac{c_i}{c_a}, \quad (9)$$

263

264 where  $a$  is the carbon isotope fractionation due to diffusion of CO<sub>2</sub> in air (4.4‰; Farquhar et al., 1982),  $b$   
265 is the fractionation associated with RuBP carboxylase (30‰; Roeske and O'Leary, 1984), and  $\Delta_{leaf}$  is the  
266 net fractionation between air and assimilated carbon ( $[\delta^{13}\text{C}_{air} - \delta^{13}\text{C}_{leaf}]/[1 + \delta^{13}\text{C}_{leaf}/1000]$ ).

267 Equation (9) can be expanded to include other effects, including photorespiration (Farquhar et  
268 al., 1982):

269

$$270 \Delta_{leaf} = a + (b - a) \times \frac{c_i}{c_a} - \frac{f\Gamma^*}{c_a}, \quad (10)$$

271

272 where  $f$  is the carbon isotope fractionation due to photorespiration. Photorespiration occurs when the  
273 enzyme rubisco fixes O<sub>2</sub>, not CO<sub>2</sub> (i.e., RuBP oxygenase). One product of photorespiration is CO<sub>2</sub> (Jones,  
274 1992), whose  $\delta^{13}\text{C}$  is lower than the source substrate glycine. If this respired CO<sub>2</sub> escapes to the  
275 atmosphere, the  $\delta^{13}\text{C}$  of the leaf carbon becomes more positive. Thus, if  $c_i/c_a$  is calculated using Eq. (9),  
276 as is common practice, the calculation may be falsely low, leading to an underprediction of atmospheric  
277 CO<sub>2</sub>.

278 Measured values for  $f$  vary from ~9-15‰ (see compilation in Schubert and Jahren, 2018), which  
279 is in line with theoretical predictions (Tcherkez, 2006). At a 400 ppm atmospheric CO<sub>2</sub> and  $\Gamma^*$  of 40 ppm,  
280 Eq. (10) implies that ~1‰ of  $\Delta_{leaf}$  is due to photorespiration, meaning that  $c_i/c_a$  should be ~0.04 higher  
281 relative to Eq. (9). Here, using the suite of fossil and extant leaves described in Sect. 2.2, we explore how  
282 the carbon isotopic fractionation associated with photorespiration affects CO<sub>2</sub> estimates with the Franks  
283 model. Because  $c_i/c_a$  is present in both of the fundamental equations (Eqs. 2 and 3), we solve them  
284 iteratively until  $c_i/c_a$  converges.

285

### 286 2.4 Leaves that grow close to the forest floor

287

288 The composition of air close to the forest floor can differ considerably from the well-mixed atmosphere.  
289 Of relevance to the Franks model, soil respiration can lead to a locally higher CO<sub>2</sub> concentration and  
290 lower  $\delta^{13}\text{C}_{air}$  (Table 24). This effect is strongest at night, when the forest boundary layer is thickest (e.g.,  
291 Munger and Hadley, 2017), but we focus here on daylight hours because that is when most plants take  
292 up CO<sub>2</sub>. In wet tropical forests, which can have very high soil respiration rates, CO<sub>2</sub> during the day near  
293 the forest floor can be elevated by tens-of-ppm, and the  $\delta^{13}\text{C}_{air}$  can be 2-3‰ lower; in temperate forests,  
294 the deviations are smaller (Table 24). Above ~2 m, CO<sub>2</sub> concentrations and air  $\delta^{13}\text{C}$  during the daytime  
295 largely match the well-mixed atmosphere.

296

297

298 **Table 24.** Deviations in the  $\delta^{13}\text{C}$  and concentration of  $\text{CO}_2$  close to a forest floor relative to well-mixed air  
 299 above the canopy. All measurements were made close to mid-day.

| Study                     | $\delta^{13}\text{C}_{\text{air}}$ relative to well-mixed air (‰) | $\text{CO}_2$ relative to well-mixed air (ppm) | Height above forest floor (m) | Forest location                          |
|---------------------------|-------------------------------------------------------------------|------------------------------------------------|-------------------------------|------------------------------------------|
| <b>Tropical forest</b>    |                                                                   |                                                |                               |                                          |
| Broadmeadow et al. (1992) | -2                                                                | +20                                            | 0.15-1                        | Trinidad during dry season               |
| Buchmann et al. (1997)    | -2                                                                | +30                                            | 0.70-0.75                     | French Guiana during wet and dry seasons |
| Holtum and Winter (2001)  | NA                                                                | +50                                            | 0.10                          | Panama during wet and dry seasons        |
| Lloyd et al. (1996)       | -3                                                                | +70                                            | 1                             | Brazil (Amazon Basin)                    |
| Quay et al. (1989)        | -3                                                                | +20                                            | 2                             | Brazil (Amazon Basin)                    |
| Sternberg et al. (1989)   | -2                                                                | +25                                            | 1                             | Panama during wet and dry seasons        |
| <b>Temperate forest</b>   |                                                                   |                                                |                               |                                          |
| Francey et al. (1985)     | -1                                                                | +20                                            | 1                             | Tasmania                                 |
| Munger and Hadley (2017)  | NA                                                                | +15                                            | 1                             | Massachusetts (Harvard Forest)           |

300

301

302 As a result, leaves that grow close to the forest floor may cause the Franks model to produce  
 303  $\text{CO}_2$  estimates higher than that of the mixed atmosphere for at least two reasons. First, the  
 304 concentration of  $\text{CO}_2$  near the forest floor is elevated; that is, the model may correctly estimate a  $\text{CO}_2$   
 305 concentration that the user is not interested in. Second, because the  $\delta^{13}\text{C}_{\text{air}}$  that a forest-floor plant  
 306 experiences is lower than the global well-mixed value, if the user chooses the well-mixed value for  
 307 model input (inferred, for example, from the  $\delta^{13}\text{C}$  of marine carbonate; Tipple et al., 2010),  $c_i/c_a$  and thus  
 308 atmospheric  $\text{CO}_2$  will be overestimated (see Eq. 2).

309 We sought to test how the Franks model is affected by the forest-floor microenvironment for  
 310 five tropical angiosperm species and fifteen temperate angiosperm and fern species. The tropical leaves  
 311 were sampled at ~1-2 m height from Parque Nacional San Lorenzo, Panama. In contrast to the canopy  
 312 data set from San Lorenzo (Sect. 2.1), these  $\text{CO}_2$  estimates have not been previously reported. In the  
 313 summer of 2015, seven fern species were sampled at ~0.5 m height from Connecticut College and  
 314 Wesleyan University. Also, we used leaf vouchers from Royer et al. (2010), who sampled eight  
 315 herbaceous angiosperm species at ~0.1-0.2 m height from Reed Gap, Connecticut. For all 20 species,  
 316 stomatal and carbon isotopic measurements follow the methods described in Sect. 2.1. Table S1  
 317 contains all of the inputs needed to run the Franks model, along with the estimated  $\text{CO}_2$  concentrations.

318 We also investigated if we could include the forest-floor  $\delta^{13}\text{C}_{\text{air}}$  effect in our estimates of  
 319 atmospheric  $\text{CO}_2$ . If the only  $\text{CO}_2$  inputs close to the forest floor are from the soil and well-mixed  
 320 atmosphere, the system can be modeled as a two-endmember mixing model where  $\delta^{13}\text{C}_{\text{air}}$  has a  
 321 positive, linear relationship with  $1/\text{CO}_2$  (Keeling, 1958). If the  $\text{CO}_2$  concentration and  $\delta^{13}\text{C}$  of both  
 322 endmembers are known, the forest-floor microenvironment should fall somewhere on the modelled  
 323 line. Importantly, the Franks model provides a second constraint on the system. Here,  $\delta^{13}\text{C}_{\text{air}}$  has a  
 324 negative, nonlinear relationship with  $1/\text{CO}_2$  because  $\delta^{13}\text{C}_{\text{air}}$  is positively related to  $c_i/c_a$  and  $\text{CO}_2$ . The  
 325 Franks model thus provides a second calculation for the relationship between  $\delta^{13}\text{C}_{\text{air}}$  and estimated  $\text{CO}_2$

326 concentration. The intersection between the two curves should be the correct  $\delta^{13}\text{C}_{\text{air}}$  and  $\text{CO}_2$   
327 concentration for the forest-floor microenvironment.

328 To estimate the soil  $\text{CO}_2$  endmember, we measured the  $\delta^{13}\text{C}$  of soil organic matter collected  
329 from the A horizons of 13 soil sites at San Lorenzo, and of five each at Reed Gap and Connecticut  
330 College. For all soils, we assume a 5000 ppm  $\text{CO}_2$  concentration for a depth that is below the zone of  $\text{CO}_2$   
331 diffusion from the atmosphere ( $\sim 0.3$  m; Cerling, 1999; Breecker et al., 2009). The true value for wet  
332 temperate and tropical forest soils may be somewhat less or substantially more than 5000 ppm (Medina  
333 et al., 1986; Cerling, 1999; Hirano et al., 2003; Hashimoto et al., 2004; Sotta et al., 2004). Because the  
334 mixing model uses  $1/\text{CO}_2$ , a much higher  $\text{CO}_2$  concentration (e.g., 10000 ppm) has little impact on our  
335 results.

336  
337

### 338 3 Results and Discussion

339

#### 340 3.1 General testing in living plants

341

342 Estimates of  $\text{CO}_2$  across the 40 tree species sampled in the field range from 275 to 850 ppm, with a  
343 mean of 478 ppm and median of 472 ppm (Fig. 2); two-thirds of the estimates range between 353 and  
344 585 ppm. In 28% of the tested species, the estimated  $\text{CO}_2$  concentrations overlap with the target  
345 concentration (400 ppm) at 95% confidence; for these species, the  $\text{CO}_2$  estimates do not differ  
346 significantly from the target. There are no strong differences across taxonomic orders, nor between  
347 leaves from tropical and temperate forests. The mean error rate across the estimates is 28% (median =  
348 24%), which is higher than estimates that include direct measurements of the physiological inputs  $A_0$   
349 and  $g_{c(\text{op})}/g_{c(\text{max})}$  (mean = 20%; median = 13%; Fig. 1). Along similar lines, if the estimates presented in Fig.  
350 1 are re-estimated using the values for  $A_0$  and  $g_{c(\text{op})}/g_{c(\text{max})}$  recommended by Franks et al. (2014), the  
351 mean error rate increases to 37% (median = 33%). If only the default values of  $A_0$  are used, the median  
352 error rate is 27%; and for only default values of  $g_{c(\text{op})}/g_{c(\text{max})}$ , 22%.

353 These results indicate that  $\text{CO}_2$  accuracy is generally improved when  $A_0$  and/or  $g_{c(\text{op})}/g_{c(\text{max})}$  is  
354 measured. These measurements require expensive gas-exchange equipment and are not always easy or  
355 practical to make. Moreover,  $A_0$  and  $g_{c(\text{op})}/g_{c(\text{max})}$  cannot be measured on fossils. Some gains in accuracy  
356 are possible by measuring  $A_0$  and  $g_{c(\text{op})}/g_{c(\text{max})}$  on extant relatives of the fossil species (e.g., the same  
357 genus). Absent of this, our analysis using the recommended mean values of Franks et al. (2014) indicates  
358 an error rate, on average, of approximately 28%. This is comparable to or better than other leading  
359 paleo- $\text{CO}_2$  proxies (Franks et al., 2014).

360 One reliable way to improve accuracy is to estimate  $\text{CO}_2$  with multiple species because the  
361 falsely-high and falsely-low estimates partially cancel each other out. The grand mean of estimates  
362 presented in Fig. 2 (478 ppm) is 20% from the 400 ppm target, which is less than the 28% mean error  
363 rate of individual estimates.

364  
365

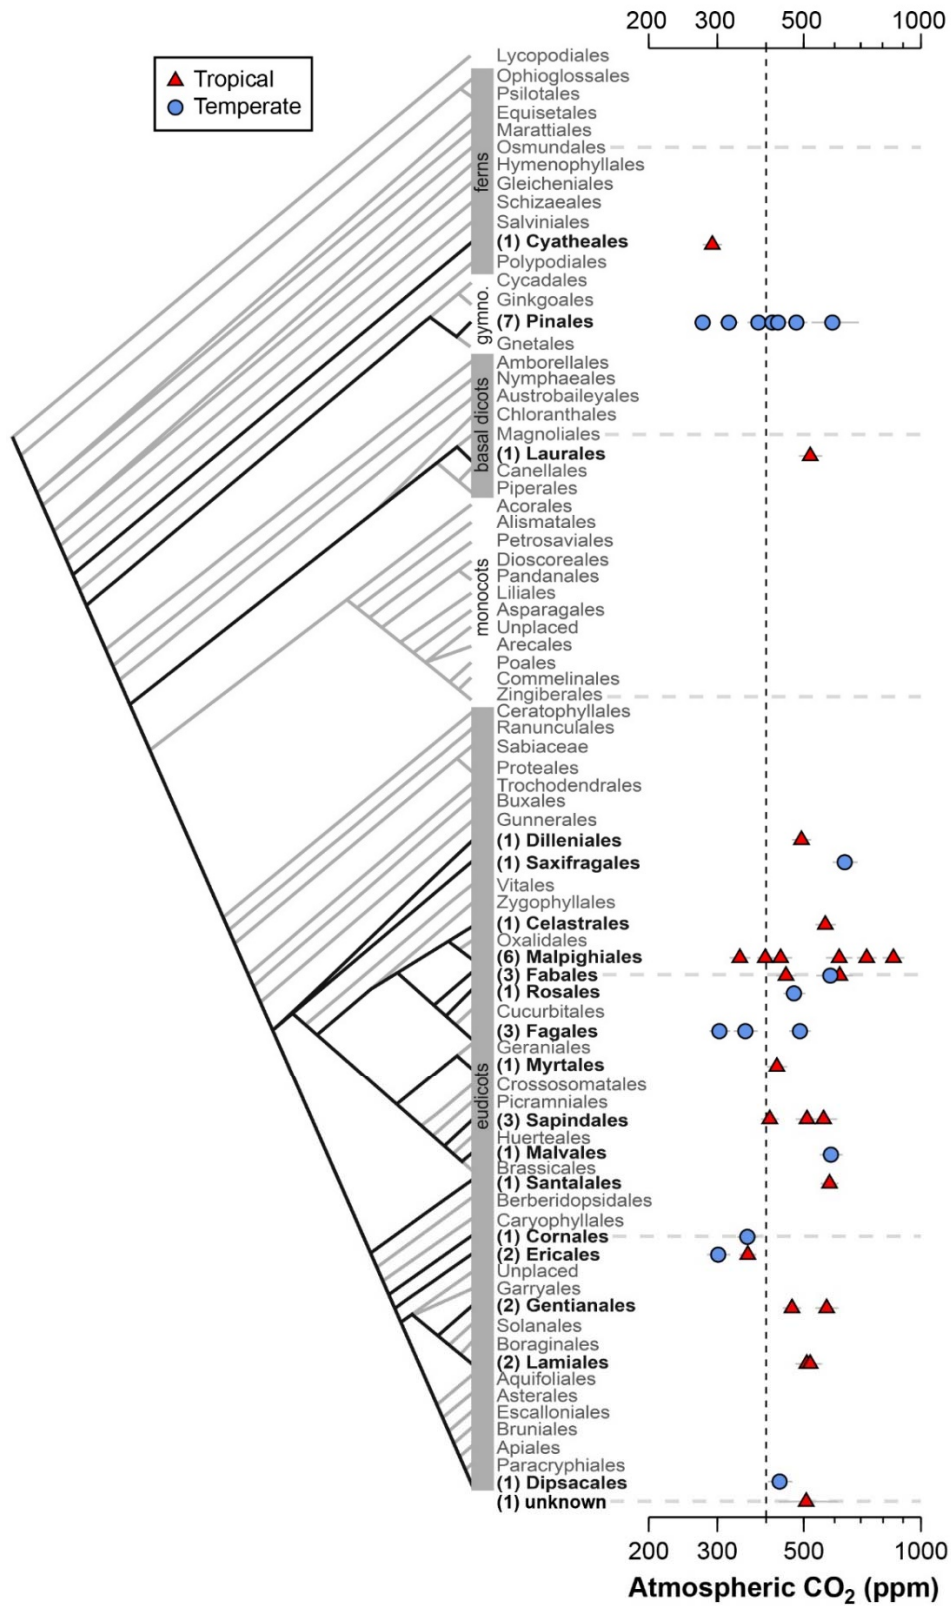

366  
 367 **Figure 2.** Estimates of CO<sub>2</sub> based on canopy leaves from 40 tree species. Uncertainties in the estimates  
 368 correspond to the 16<sup>th</sup>-84<sup>th</sup> percentile range. Vertical line is the correct concentration (400 ppm). On the  
 369 left is an order-level vascular plant phylogeny (APW v.13; Stevens, 2001 onwards).



370  
371  
372  
373  
374  
375  
376  
377  
378  
379  
380  
381  
382  
383

Dow et al. (2014) observed that  $g_{c(op)}/g_{c(max)}$  inversely varies with  $CO_2$  in *Arabidopsis thaliana*, but primarily at subambient concentrations (yellow triangles in Fig. 3). At elevated  $CO_2$ ,  $g_{c(op)}/g_{c(max)}$  is close to 0.2, which is the value recommended by Franks et al. (2014). Data from eleven species of angiosperms, conifers, and ferns at present-day (or near present-day) and elevated  $CO_2$  concentrations support the view of a limited effect at high  $CO_2$  (Fig. 3; Franks et al., 2014; Londoño et al., 2018; Milligan et al., in review). More data at subambient  $CO_2$  are needed, but for  $CO_2$  concentrations similar to or higher than the present-day, we see no strong reason to include a  $CO_2$  sensitivity in  $g_{c(op)}/g_{c(max)}$ . The rather low values for *Cedrus deodara* and many of the tropical angiosperms ( $<0.1$ ) are likely due to stress imposed by their growth chamber environment; these  $g_{c(op)}/g_{c(max)}$  values are probably not representative of field-grown trees, which tend to be closer to 0.2 (Franks et al., 2014).

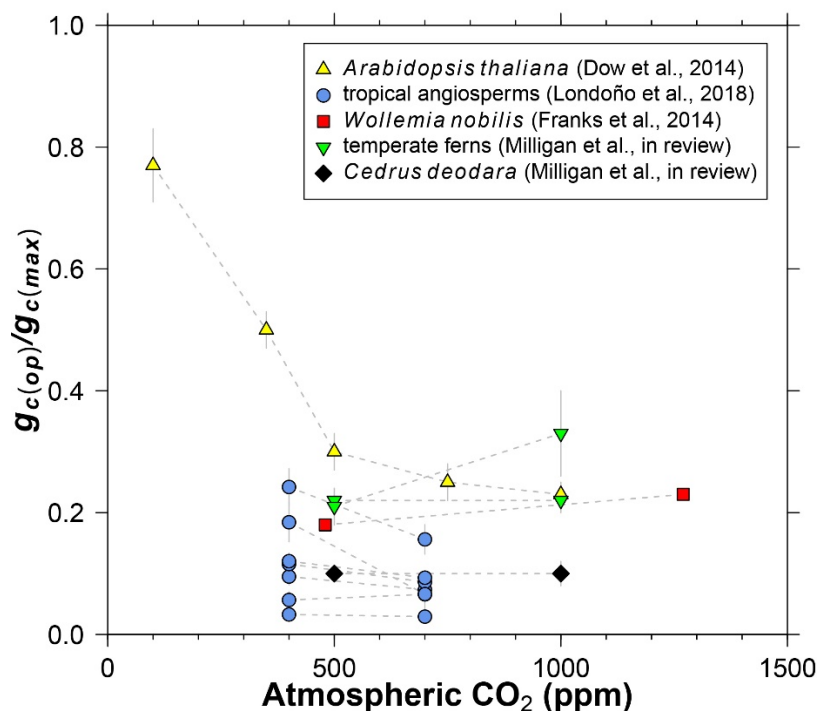

384  
385 **Figure 3.** Literature compilation of the sensitivity of  $g_{c(op)}/g_{c(max)}$  (ratio of operational to maximum leaf  
386 conductance to  $CO_2$ ) to atmospheric  $CO_2$  concentration.

387  
388  
389 3.2 Temperature

390  
391 The temperature sensitivities of the ratio of diffusivity of  $CO_2$  in air to the molar volume of air ( $d/v$ ) and  
392 the  $CO_2$  compensation point in the absence of dark respiration ( $\Gamma^*$ ) have little effect on estimated  $CO_2$  in  
393 the Franks model (Fig. 4). Given that assimilation-weighted leaf temperature only varies about 7 °C  
394 across plants today, the differences shown in Fig. 4—which are based on leaf temperatures of 25 °C and  
395 15 °C—are likely a maximum effect. As such, we consider the use of a fixed leaf temperature (e.g., 25 °C)  
396 in the model to be a defensible simplification.

397  
398

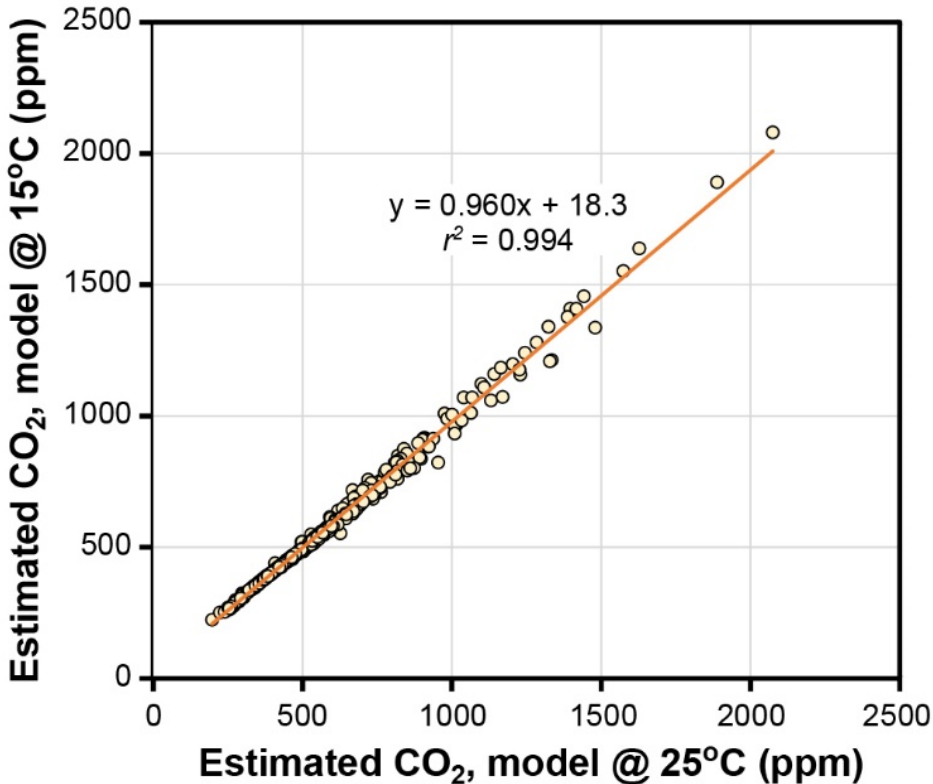

**Figure 4.** Estimates of CO<sub>2</sub> at leaf temperatures of 25 °C and 15 °C. Each symbol is an extant or fossil leaf. The difference in estimated CO<sub>2</sub> for any leaf is due to the theoretical effects of temperature on gas diffusion ( $d/v$ ) and the CO<sub>2</sub> compensation point in the absence of dark respiration ( $\Gamma^*$ ) (Eqs. 6-8).

Other inputs in the model may respond to temperature, though. In our growth chamber experiments where daytime air temperatures were 28 °C and 20 °C, the effect on estimated CO<sub>2</sub> was mixed (Fig. 5). In five out of six species, estimated CO<sub>2</sub> was higher in the warm treatment, but for all species these differences were not statistically significant ( $P > 0.05$  based on a KS test; see Methods). Incorporating the temperature sensitivities in  $d/v$  and  $\Gamma^*$  had little effect (“adj” estimates in Fig. 5), as expected from Fig. 4.

None of the measured inputs—stomatal density, stomatal pore length, single guard cell width, and leaf  $\delta^{13}\text{C}$ —were significantly affected by temperature across all species ( $P > 0.05$  for each of the four inputs based on a mixed model; see Methods). These small differences probably cannot account for the differences in estimated CO<sub>2</sub> between temperatures. It is more likely that some of the inputs that we did not directly measure, such as assimilation rate ( $A_0$ ), the  $g_{c(op)}/g_{c(max)}$  ratio, or mesophyll conductance ( $g_m$ ), differ from the true mean value. In the cases for the five species where estimated CO<sub>2</sub> is higher in the warm treatment, our mean  $A_0$  for the warm plants must be falsely high, or  $g_{c(op)}/g_{c(max)}$  or  $g_m$  falsely low.

In summary, we see no strong reason to expand the parameterization of temperature in the model, though more growth-chamber experiments may be warranted. We note that in three out of the six species from the warm treatment, the estimated CO<sub>2</sub> cannot be distinguished from the 500 ppm target at 95% confidence; for the cool treatment, this is true for four of the species. Also, the across-species means of estimated CO<sub>2</sub> for the warm and cool treatments are reasonably close to the 500-ppm target (590 and 502 ppm, respectively) and overall have a mean error rate of 25%. This level of uncertainty is similar to our field estimates where we did not measure  $A_0$  or  $g_{c(op)}/g_{c(max)}$  (28%; see Fig. 2).

425 This too provides support for our recommendation that it is not critical to include a broader treatment  
426 of temperature in the model.

427  
428

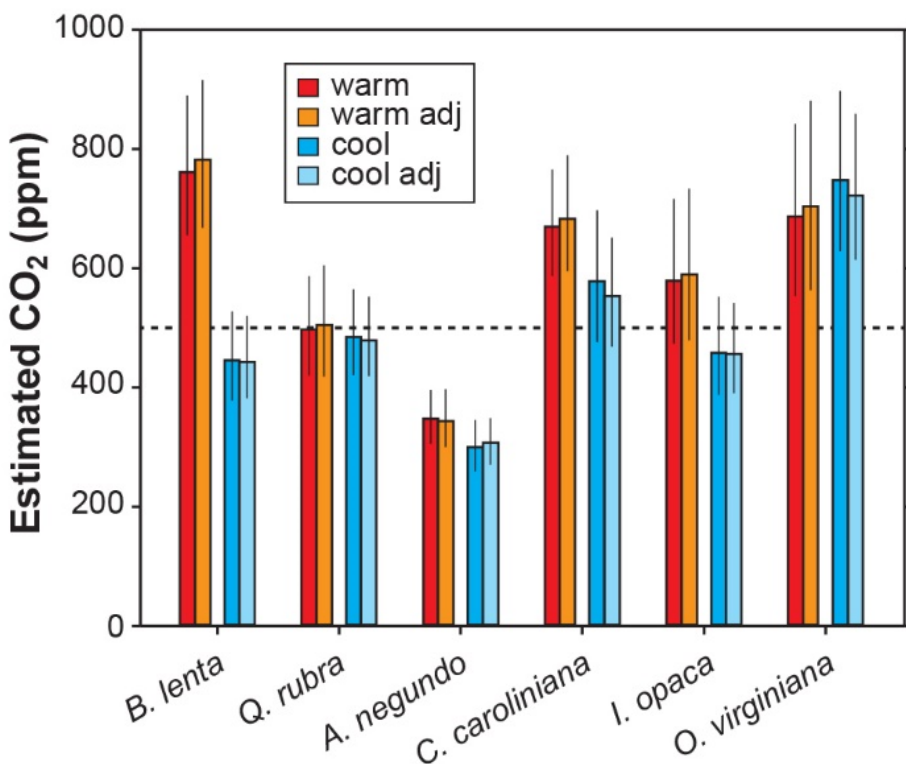

429 **Figure 5.** Estimates of CO<sub>2</sub> for plants grown inside growth chambers at daytime air temperatures of 28 °C  
430 and 20 °C. Also shown are estimates after taking into account the temperature sensitivity of gas  
431 diffusion ( $d/v$ ) and the CO<sub>2</sub> compensation point in the absence of dark respiration ( $\Gamma^*$ ) (“adj”; see also  
432 Fig. 4). Dashed line is the correct CO<sub>2</sub> concentration (500 ppm). Uncertainties in the estimates  
433 correspond to the 16<sup>th</sup>-84<sup>th</sup> percentile range.

434

435

436

437

### 3.3 Photorespiration

438

439 The theoretical effects of photorespiration do not strongly impact estimates of CO<sub>2</sub> in the Franks model.  
440 The average effect for our 409 extant and fossil leaves is to increase estimated CO<sub>2</sub> by 2.2% plus 38 ppm  
441 (Fig. 6). At 1000 ppm, for example, estimates would increase by 60 ppm. This calculation assumes a  
442 photorespiration fractionation ( $f$ ) of 9.1‰, which is the value estimated for *Arabidopsis thaliana*  
443 (Schubert and Jahren, 2018). If a fractionation towards the upper bound of published estimates is used  
444 instead (15‰), estimated CO<sub>2</sub> increases on average by 3.8% plus 61 ppm. Across this range in  $f$ , the  
445 associated uncertainty in estimated CO<sub>2</sub> is well within the method’s overall precision ( $\sim$ +35/-25% at 95%  
446 confidence; Franks et al., 2014). As such, CO<sub>2</sub> estimates made without these photorespiration effects  
447 (i.e. using Eq. 9 instead of Eq. 10) should be reliable, although some improvement is possible using Eq.  
448 10 in cases where  $f$  is accurately known.

449

450

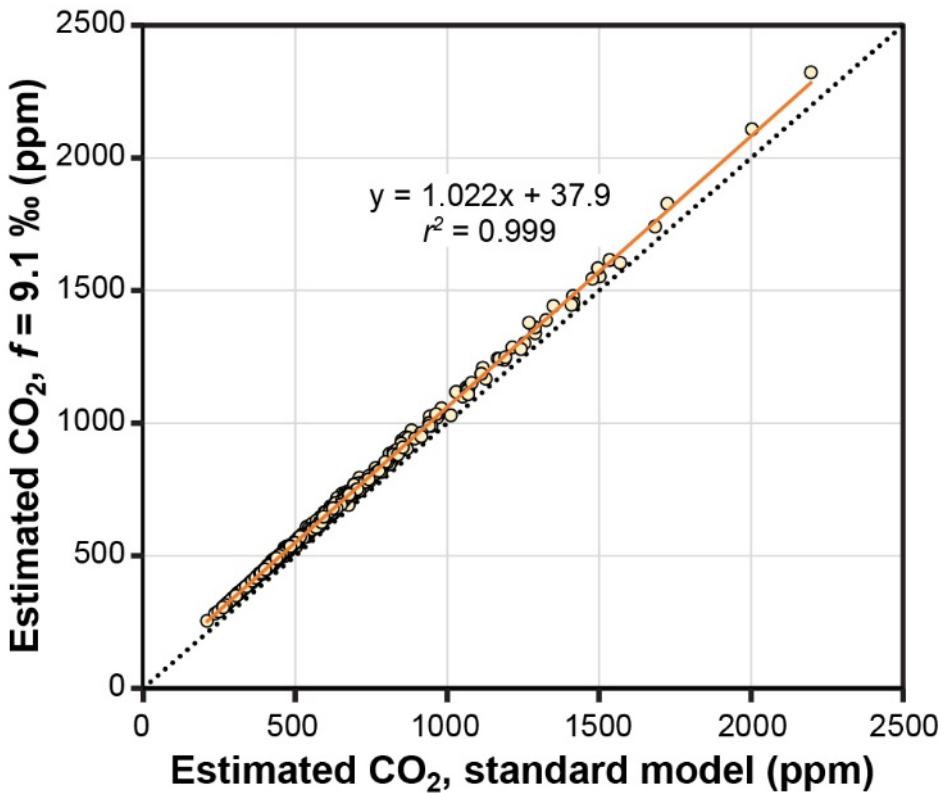

451  
 452 **Figure 6.** Estimates of CO<sub>2</sub> with and without a photorespiration effect ( $f = 9.1‰$ ; see Eq. 10). Each  
 453 symbol is an extant or fossil leaf. Dashed line is  $y=x$ .

454  
 455  
 456 We note that both  $f$  and  $\Gamma^*$  are also affected by atmospheric O<sub>2</sub> concentration. Because O<sub>2</sub> is  
 457 directly responsible for photorespiration,  $f$  should scale with O<sub>2</sub> (or, more precisely, the O<sub>2</sub>:CO<sub>2</sub> molar  
 458 ratio). Unfortunately, this effect is poorly constrained (Beerling et al., 2002; Berner et al., 2003; Porter et  
 459 al., 2017). In contrast, the theoretical effect of O<sub>2</sub> on  $\Gamma^*$  is known: it is linear with an approximate slope  
 460 of 2 (Farquhar et al., 1982; see their Eq. B13). During the Phanerozoic, O<sub>2</sub> likely ranged from 10-30%,  
 461 with lows during the early Paleozoic and early Triassic, and highs during the Carboniferous to early  
 462 Permian and Cretaceous (Berner, 2009; Glasspool and Scott, 2010; Arvidson et al., 2013; Mills et al.,  
 463 2016; Lenton et al., 2018). Assuming a present-day  $\Gamma^*$  of 40 ppm (at 21% O<sub>2</sub>),  $\Gamma^*$  would be 60 ppm at  
 464 30% O<sub>2</sub> and 20 ppm at 10% O<sub>2</sub>. Running the Franks model on our library of 409 extant and fossil leaves,  
 465 we find little effect on estimated CO<sub>2</sub>: estimates are 7.4% higher on average at 30% O<sub>2</sub> than at 10% O<sub>2</sub>  
 466 (see also McElwain et al., 2016).

467  
 468 **3.4 Leaves that grow close to the forest floor**

469  
 470 CO<sub>2</sub> estimates for tropical understory leaves from five species at San Lorenzo, Panama, are very high,  
 471 ranging from 1903 to 18863 ppm (species mean = 6837 ppm). For two of the species Londoño et al.  
 472 (2018) also analyzed canopy leaves from trees nearby, and these within-species comparisons highlight  
 473 the vast discrepancy (*Ocotea* sp.: 541 vs. 5737 ppm; *Tontelea* sp.: 622 vs. 18863 ppm). The primary  
 474 difference in the inputs between the canopy and understory leaves is the  $\delta^{13}\text{C}_{\text{leaf}}$ : Londoño et al. (2018)  
 475 report a species-mean  $\delta^{13}\text{C}_{\text{leaf}}$  of -30.0‰ for the 21 canopy species versus -35.6‰ for the five understory

476 species. This difference leads to very different mean estimates of  $c_i/c_a$ : 0.69 for canopy leaves versus a  
 477 highly unrealistic (Dieffendorf et al., 2010) 0.93 for understory leaves.

478 It is likely that the high CO<sub>2</sub> estimates from understory leaves are mostly driven by falsely high  
 479  $\delta^{13}\text{C}_{\text{air}}$  inputs. Following the mixing model strategy outlined in Sect. 2.4 (and based on a soil organic  
 480 matter  $\delta^{13}\text{C}$  of -28.2‰ measured at San Lorenzo), we calculate a species-mean  $\delta^{13}\text{C}_{\text{air}}$  of -16.7‰ (mean  
 481 of intersection points in Fig. 7). When this  $\delta^{13}\text{C}_{\text{air}}$  is used to estimate CO<sub>2</sub> with the Franks model (instead  
 482 of -8.5‰), the species mean drops to 699 ppm. This is somewhat higher than the species mean from  
 483 canopy leaves in the same forest (563 ppm; red triangles in Fig. 2; Londoño et al., 2018).

484  
 485

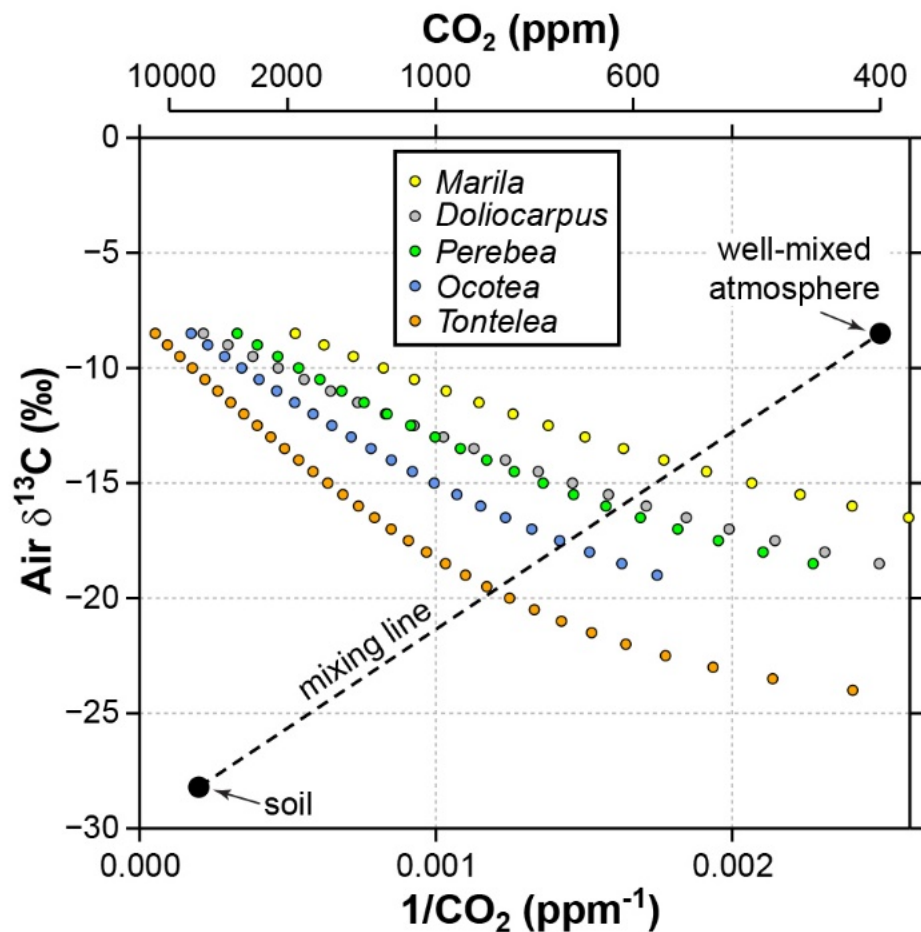

486  
 487 **Figure 7.** Sensitivity of estimated CO<sub>2</sub> in the Franks model to the  $\delta^{13}\text{C}$  of atmospheric CO<sub>2</sub>. Estimates  
 488 come from leaves of five angiosperm species that grew close to the forest floor in Parque Nacional San  
 489 Lorenzo, Panama. The step in  $\delta^{13}\text{C}_{\text{air}}$  between estimates is 0.5‰. The dashed line is a two-endmember  
 490 mixing model for CO<sub>2</sub> between the soil and well-mixed atmosphere. The intersection between the  
 491 mixing model and the Franks model should correspond to the CO<sub>2</sub> concentration and  $\delta^{13}\text{C}_{\text{air}}$  of the  
 492 forest-floor microenvironment.

493  
 494

495 Understory leaves from Connecticut temperate forests show similar but less dramatic patterns,  
 496 which we attribute to a more open canopy with stronger atmospheric mixing. CO<sub>2</sub> estimates for the 15  
 497 species range from 447 to 1567 ppm (mean = 794 ppm). Our intersection method identifies a mean

498  $\delta^{13}\text{C}_{\text{air}}$  of -11.2‰ for the Wesleyan and Connecticut College campuses (based on a soil  $\delta^{13}\text{C}$  of -27.6‰  
499 measured at Connecticut College) and -10.3‰ for Reed Gap (soil  $\delta^{13}\text{C} = -26.4\text{‰}$ ). Using these adjusted  
500  $\delta^{13}\text{C}_{\text{air}}$ , the species mean of estimated  $\text{CO}_2$  drops to 566 ppm, which is somewhat higher than the species  
501 mean from canopy leaves in the same areas (449 ppm; blue circles in Fig. 2).

502 We acknowledge that this analysis is too simple. First, we did not measure the understory  $\delta^{13}\text{C}_{\text{air}}$   
503 (this would require repeated measurements during different daytime hours over a growing season to  
504 calculate a time-integrated value); instead, we assumed a simple two end-member mixing model  
505 between the soil and well-mixed atmosphere. Second, other factors probably contribute to the  
506 differences in estimated  $\text{CO}_2$  between canopy and understory leaves. Our predicted  $\delta^{13}\text{C}_{\text{air}}$  values are too  
507 low ( $\sim 8\text{‰}$  and  $2\text{‰}$  lower than the well-mixed atmosphere for the tropical and temperate forests) and  
508 our estimated  $\text{CO}_2$  too high ( $\sim 100$  ppm higher than that from canopy leaves). In the lowermost 1-2  
509 meters of the canopy, previous work suggests up to a  $-3\text{‰}$  and  $+70$  ppm deviation in tropical forests and  
510  $-1\text{‰} / +20$  ppm in temperate forests (Table 1). One input that could help to resolve this discrepancy is  
511 the assimilation rate ( $A_0$ ). We assumed a fixed  $A_0$  of  $12 \mu\text{mol m}^{-2} \text{s}^{-1}$  for all leaves, regardless of canopy  
512 position. Shade leaves often have lower assimilation rates than sun leaves (Givnish, 1988). Substituting  
513 lower  $A_0$  values for understory leaves would lower estimated  $\text{CO}_2$  roughly in proportion (Eqs. 2-3). Using  
514 lower  $A_0$  values for shade leaves in the model is appropriate, but determining the best value is difficult.  
515 Typical  $A_0$  values for leaves growing at the top of the canopy in full sun are far more consistent because  
516 photosynthesis in these leaves is usually at its maximum capacity (saturated at full sunlight) for the  
517 prevailing atmospheric  $\text{CO}_2$  concentration. Because the degree of shadiness near the forest floor is  
518 highly variable, photosynthesis ( $A_0$ ) in these leaves will be acclimated to some fraction of the full-sun  
519 maximum in a sun exposed leaf, but careful thought must go into determining what this fraction is.

520 We note that our mixing-model strategy cannot be applied to fossils because the global  
521 atmospheric  $\text{CO}_2$  concentration is needed (one endpoint for dashed line in Fig. 7). Instead, our  
522 motivation for the analysis is to demonstrate that: 1) leaves growing in the lowermost 2 m of the canopy  
523 should be considered with caution in the context of the Franks model; and 2) the failure of the model is  
524 due to faulty inputs (mostly  $\delta^{13}\text{C}_{\text{air}}$ ), not the model itself.

525 In most fossil leaf deposits, shade morphotypes are comparatively rare (e.g., Kürschner, 1997;  
526 Wang et al., 2018) because—relative to sun leaves—they are not as tough, do not travel as far by wind,  
527 and are produced at a slower rate (Dilcher, 1973; Roth and Dilcher, 1978; Spicer, 1980; Ferguson, 1985;  
528 Burnham et al., 1992). Our recommendation is to exclude such leaves. There are several ways to  
529 differentiate sun vs. shade morphotypes: overall shape (Talbert and Holch, 1957; Givnish, 1978;  
530 Kürschner, 1997; Sack et al., 2006), shape of epidermal cells (larger and with a more undulated outline in  
531 shade leaves; Kürschner, 1997; Dunn et al., 2015), vein density (lower in shade leaves; Uhl and  
532 Mosbrugger, 1999; Sack and Scoffoni, 2013; Crifò et al., 2014; Londoño et al., 2018), and range in  $\delta^{13}\text{C}_{\text{leaf}}$   
533 (high when both sun and shade leaves are present, for example in our study; Graham et al., 2014). Not  
534 all shade leaves grow within 2 m of the forest floor, but excluding all such leaves would eliminate the  
535 forest-floor bias.

536  
537

#### 538 **4 Conclusions**

539

540 The Franks model is reasonably accurate ( $\sim 28\%$  error rate) even when the physiological inputs  $A_0$   
541 (assimilation rate at a known  $\text{CO}_2$  concentration) and  $g_{c(\text{op})}/g_{c(\text{max})}$  (ratio of operational to maximum leaf  
542 conductance to  $\text{CO}_2$ ) are inferred, not measured. Accuracy does improve when these inputs are  
543 measured ( $\sim 19\%$  error rate), but such measurements are not possible with fossils and may not always  
544 be feasible with nearest living relatives. A 28% error rate is broadly in line with (or better than) other  
545 leading paleo- $\text{CO}_2$  proxies.

546 Most of the possible confounding factors that we investigated appear minor. The temperature  
547 sensitivities of  $d/v$  (related to gas diffusion) and  $\Gamma^*$  ( $\text{CO}_2$  compensation point in the absence of dark  
548 respiration) have a negligible impact on estimated  $\text{CO}_2$ . Our temperature experiments in growth  
549 chambers point to larger differences in some species, which must be related to incorrect values for  
550 inputs that were not directly measured, such as  $A_0$ ,  $g_{c(\text{op})}/g_{c(\text{max})}$ , and  $g_m$  (mesophyll conductance).  
551 Overall, though, we find that the differences in estimated  $\text{CO}_2$  imparted by temperature are generally  
552 smaller than the overall 28% error rate.

553 Incorporating the covariance between  $\text{CO}_2$  concentration and photorespiration leads to only  
554 small changes in estimated  $\text{CO}_2$ .  $\text{O}_2$  concentration affects photorespiration and thus may confound  $\text{CO}_2$   
555 estimates from the Franks model, but presently the effect is poorly quantified. The effect of  $\text{O}_2$  on  $\Gamma^*$  is  
556 better known, and imparts only small changes in estimated  $\text{CO}_2$  across a feasible range in Phanerozoic  
557  $\text{O}_2$  of 10-30%.

558 Leaves from the lowermost 1-2 m of the canopy experience slightly elevated  $\text{CO}_2$  concentrations  
559 and lower air  $\delta^{13}\text{C}$  during the daytime relative to the well-mixed atmosphere. We find that if we use the  
560 well-mixed air  $\delta^{13}\text{C}$  to estimate  $\text{CO}_2$  from leaves that grew near the forest floor, estimates are too high,  
561 especially in dense tropical canopies. When we use a two-endmember mixing model to calculate the  
562 correct local air  $\delta^{13}\text{C}$ , the falsely-high  $\text{CO}_2$  estimates largely disappear. For fossil applications, shade  
563 leaves from the bottom of the canopy should be avoided. Shade leaves are typically rare in the fossil  
564 record (relative to sun leaves), and can be identified by their overall shape, the shape of their epidermal  
565 cells, their low leaf  $\delta^{13}\text{C}$ , and their low vein density.

566 Conceptually, the Franks model holds considerable promise for quantifying paleo- $\text{CO}_2$ : it is  
567 mechanistically grounded and can be applied to most fossil leaves. Our tests of the model's accuracy  
568 and sensitivity to temperature and photorespiration largely uphold this promise.

569  
570

571 **Author contribution.** DR, KM, MM, and LL designed and conducted the experiments; all authors  
572 interpreted the data; DR prepared the manuscript with contributions from all co-authors.

573

574 **Competing interests.** The authors declare that they have no conflict of interest.

575

576 **Acknowledgements.** We thank G. Dreyer and P. Siver for logistical support at Connecticut College, S.  
577 Wang for lab assistance, and C. Crifò and A. Baresh for collecting the tropical samples. Support for LL  
578 was provided by the Smithsonian Tropical Research Institute; the Mark Tupper Fellowship; National  
579 Science Foundation grants EAR 0824299 and OISE, EAR, DRL 0966884; the Anders Foundation; and the  
580 Gregory D. and Jennifer Walston Johnson and 1923 Fund.

581

582

## 583 **References**

584 Arvidson, R. S., Mackenzie, F. T., and Guidry, M. W.: Geologic history of seawater: A MAGic approach to  
585 carbon chemistry and ocean ventilation, *Chemical Geology*, 362, 287-304,

586 <https://doi.org/10.1016/j.chemgeo.2013.10.012>, 2013.

587 Barclay, R. S. and Wing, S. L.: Improving the *Ginkgo*  $\text{CO}_2$  barometer: implications for the early Cenozoic  
588 atmosphere, *Earth and Planetary Science Letters*, 439, 158-171,

589 <https://doi.org/10.1016/j.epsl.2016.01.012>, 2016.

590 Bates, D., Mächler, M., Bolker, B., and Walker, S.: Fitting linear mixed-effects models using lme4, *Journal*  
591 *of Statistical Software*, 67, <https://doi.org/10.18637/jss.v067.i01>, 2015.

592 Beerling, D. J.: Evolutionary responses of land plants to atmospheric CO<sub>2</sub>, in: A History of Atmospheric  
593 CO<sub>2</sub> and Its Effects on Plants, Animals, and Ecosystems, edited by: Ehleringer, J. R., Cerling, T. E.,  
594 and Dearing, M. D., Springer, New York, 114-132, 2005.

595 Beerling, D. J., Fox, A., and Anderson, C. W.: Quantitative uncertainty analyses of ancient atmospheric  
596 CO<sub>2</sub> estimates from fossil leaves, *American Journal of Science*, 309, 775-787,  
597 <https://doi.org/10.2475/09.2009.01>, 2009.

598 Beerling, D. J., Lake, J. A., Berner, R. A., Hickey, L. J., Taylor, D. W., and Royer, D. L.: Carbon isotope  
599 evidence implying high O<sub>2</sub>/CO<sub>2</sub> ratios in the Permo-Carboniferous atmosphere, *Geochimica et*  
600 *Cosmochimica Acta*, 66, 3757-3767, [https://doi.org/10.1016/S0016-7037\(02\)00901-8](https://doi.org/10.1016/S0016-7037(02)00901-8), 2002.

601 Bernacchi, C. J., Pimentel, C., and Long, S. P.: *In vivo* temperature response functions of parameters  
602 required to model RuBP-limited photosynthesis, *Plant, Cell & Environment*, 26, 1419-1430,  
603 <https://doi.org/10.1046/j.0016-8025.2003.01050.x>, 2003.

604 Berner, R. A.: Phanerozoic atmospheric oxygen: new results using the GEOCARBSULF model, *American*  
605 *Journal of Science*, 309, 603-606, <https://doi.org/10.2475/07.2009.03>, 2009.

606 Berner, R. A., Beerling, D. J., Dudley, R., Robinson, J. M., and Wildman, R. A.: Phanerozoic atmospheric  
607 oxygen, *Annual Review of Earth and Planetary Sciences*, 31, 105-134,  
608 <https://doi.org/10.1146/annurev.earth.31.100901.141329>, 2003.

609 Breecker, D. O., Sharp, Z. D., and McFadden, L. D.: Seasonal bias in the formation and stable isotopic  
610 composition of pedogenic carbonate in modern soils from central New Mexico, USA, *Geological*  
611 *Society of America Bulletin*, 121, 630-640, <https://doi.org/10.1130/B26413.1>, 2009.

612 Broadmeadow, M., Griffiths, H., Maxwell, C., and Borland, A.: The carbon isotope ratio of plant organic  
613 material reflects temporal and spatial variations in CO<sub>2</sub> within tropical forest formations in  
614 Trinidad, *Oecologia*, 89, 435-441, <https://doi.org/10.1007/BF00317423>, 1992.

615 Buchmann, N., Guehl, J.-M., Barigah, T., and Ehleringer, J. R.: Interseasonal comparison of CO<sub>2</sub>  
616 concentrations, isotopic composition, and carbon dynamics in an Amazonian rainforest (French  
617 Guiana), *Oecologia*, 110, 120-131, <https://doi.org/10.1007/s004420050140>, 1997.

618 Burnham, R. J., Wing, S. L., and Parker, G. G.: The reflection of deciduous forest communities in leaf  
619 litter: implications for autochthonous litter assemblages from the fossil record, *Paleobiology*, 18,  
620 30-49, <https://doi.org/10.1017/S0094837300012203>, 1992.

621 Cerling, T. E.: Stable carbon isotopes in palaeosol carbonates, *Special Publications of the International*  
622 *Association of Sedimentologists*, 27, 43-60, 1999.

623 Chaloner, W. G. and McElwain, J.: The fossil plant record and global climatic change, *Review of*  
624 *Palaeobotany and Palynology*, 95, 73-82, [https://doi.org/10.1016/S0034-6667\(96\)00028-0](https://doi.org/10.1016/S0034-6667(96)00028-0),  
625 1997.

626 Crifò, C., Currano, E. D., Baresch, A., and Jaramillo, C.: Variations in angiosperm leaf vein density have  
627 implications for interpreting life form in the fossil record, *Geology*, 42, 919-922,  
628 <https://doi.org/10.1130/g35828.1>, 2014.

629 Diefendorf, A. F., Mueller, K. E., Wing, S. L., Koch, P. L., and Freeman, K. H.: Global patterns in leaf <sup>13</sup>C  
630 discrimination and implications for studies of past and future climate, *Proceedings of the*  
631 *National Academy of Sciences, USA*, 107, 5738-5743, <https://doi.org/10.1073/pnas.0910513107>,  
632 2010.

633 Dilcher, D. L.: A paleoclimatic interpretation of the Eocene floras of southeastern North America, in:  
634 *Vegetation and Vegetational History of Northern Latin America*, edited by: Graham, A., Elsevier,  
635 Amsterdam, 39-53, 1973.

636 Doria, G., Royer, D. L., Wolfe, A. P., Fox, A., Westgate, J. A., and Beerling, D. J.: Declining atmospheric  
637 CO<sub>2</sub> during the late Middle Eocene climate transition, *American Journal of Science*, 311, 63-75,  
638 <https://doi.org/10.2475/01.2011.03>, 2011.



639 Dow, G. J., Bergmann, D. C., and Berry, J. A.: An integrated model of stomatal development and leaf  
640 physiology, *New Phytologist*, 201, 1218-1226, <https://doi.org/10.1111/nph.12608>, 2014.

641 Dunn, R. E., Strömberg, C. A. E., Madden, R. H., Kohn, M. J., and Carlini, A. A.: Linked canopy, climate,  
642 and faunal change in the Cenozoic of Patagonia, *Science*, 347, 258-261,  
643 <https://doi.org/10.1126/science.1260947>, 2015.

644 Erdei, B., Utescher, T., Hably, L., Tamás, J., Roth-Nebelsick, A., and Grein, M.: Early Oligocene continental  
645 climate of the Palaeogene Basin (Hungary and Slovenia) and the surrounding area, *Turkish  
646 Journal of Earth Sciences*, 21, 153-186, <https://doi.org/10.3906/yer-1005-29>, 2012.

647 Farquhar, G., von Caemmerer, S., and Berry, J.: A biochemical model of photosynthetic CO<sub>2</sub> assimilation  
648 in leaves of C<sub>3</sub> species, *Planta*, 149, 78-90, <https://doi.org/10.1007/BF00386231>, 1980.

649 Farquhar, G. D. and Sharkey, T. D.: Stomatal conductance and photosynthesis, *Annual Review of Plant  
650 Physiology*, 33, 317-345, <https://doi.org/10.1146/annurev.pp.33.060182.001533>, 1982.

651 Farquhar, G. D., O'Leary, M. H., and Berry, J. A.: On the relationship between carbon isotope  
652 discrimination and the intercellular carbon dioxide concentration in leaves, *Australian Journal of  
653 Plant Physiology*, 9, 121-137, <https://doi.org/10.1071/PP9820121>, 1982.

654 Ferguson, D. K.: The origin of leaf-assemblages—new light on an old problem, *Review of Palaeobotany  
655 and Palynology*, 46, 117-188, [https://doi.org/10.1016/0034-6667\(85\)90041-7](https://doi.org/10.1016/0034-6667(85)90041-7), 1985.

656 Francey, R., Gifford, R., Sharkey, T., and Weir, B.: Physiological influences on carbon isotope  
657 discrimination in huon pine (*Lagarostrobos franklinii*), *Oecologia*, 66, 211-218,  
658 <https://doi.org/10.1007/BF00379857>, 1985.

659 Franks, P. J., Leitch, I. J., Ruszala, E. M., Hetherington, A. M., and Beerling, D. J.: Physiological framework  
660 for adaptation of stomata to CO<sub>2</sub> from glacial to future concentrations, *Philosophical  
661 Transactions of the Royal Society B*, 367, 537-546, <https://doi.org/10.1098/rstb.2011.0270>,  
662 2012.

663 Franks, P. J., Royer, D. L., Beerling, D. J., Van de Water, P. K., Cantrill, D. J., Barbour, M. M., and Berry, J.  
664 A.: New constraints on atmospheric CO<sub>2</sub> concentration for the Phanerozoic, *Geophysical  
665 Research Letters*, 41, 4685-4694, <https://doi.org/10.1002/2014gl060457>, 2014.

666 Givnish, T. J.: Ecological aspects of plant morphology: leaf form in relation to environment, *Acta  
667 Biotheoretica*, 27, 83-142, 1978.

668 Givnish, T. J.: Adaptation to sun and shade: a whole-plant perspective, *Australian Journal of Plant  
669 Physiology*, 15, 63-92, <https://doi.org/10.1071/PP9880063>, 1988.

670 Glasspool, I. J. and Scott, A. C.: Phanerozoic concentrations of atmospheric oxygen reconstructed from  
671 sedimentary charcoal, *Nature Geoscience*, 3, 627-630, <https://doi.org/10.1038/ngeo923>, 2010.

672 Graham, H. V., Patzkowsky, M. E., Wing, S. L., Parker, G. G., Fogel, M. L., and Freeman, K. H.: Isotopic  
673 characteristics of canopies in simulated leaf assemblages, *Geochimica et Cosmochimica Acta*,  
674 144, 82-95, <https://doi.org/10.1016/j.gca.2014.08.032>, 2014.

675 Grein, M., Utescher, T., Wilde, V., and Roth-Nebelsick, A.: Reconstruction of the middle Eocene climate  
676 of Messel using palaeobotanical data, *Neues Jahrbuch Für Geologie und Paläontologie  
677 Abhandlungen*, 260, 305-318, <https://doi.org/10.1127/0077-7749/2011/0139>, 2011a.

678 Grein, M., Konrad, W., Wilde, V., Utescher, T., and Roth-Nebelsick, A.: Reconstruction of atmospheric  
679 CO<sub>2</sub> during the early Middle Eocene by application of a gas exchange model to fossil plants from  
680 the Messel Formation, Germany, *Palaeogeography Palaeoclimatology Palaeoecology*, 309, 383-  
681 391, <https://doi.org/10.1016/j.palaeo.2011.07.008>, 2011b.

682 Grein, M., Oehm, C., Konrad, W., Utescher, T., Kunzmann, L., and Roth-Nebelsick, A.: Atmospheric CO<sub>2</sub>  
683 from the late Oligocene to early Miocene based on photosynthesis data and fossil leaf  
684 characteristics, *Palaeogeography Palaeoclimatology Palaeoecology*, 374, 41-51,  
685 <https://doi.org/10.1016/j.palaeo.2012.12.025>, 2013.

686 Hashimoto, S., Tanaka, N., Suzuki, M., Inoue, A., Takizawa, H., Kosaka, I., Tanaka, K., Tantasirin, C., and  
687 Tangtham, N.: Soil respiration and soil CO<sub>2</sub> concentration in a tropical forest, Thailand, Journal of  
688 Forest Research, 9, 75-79, <https://doi.org/10.1007/s10310-003-0046-y>, 2004.

689 Haworth, M., Heath, J., and McElwain, J. C.: Differences in the response sensitivity of stomatal index to  
690 atmospheric CO<sub>2</sub> among four genera of Cupressaceae conifers, Annals of Botany, 105, 411-418,  
691 <https://doi.org/10.1093/aob/mcp309>, 2010.

692 Helliker, B. R. and Richter, S. L.: Subtropical to boreal convergence of tree-leaf temperatures, Nature,  
693 454, 511-514, <https://doi.org/10.1038/nature07031>, 2008.

694 Hirano, T., Kim, H., and Tanaka, Y.: Long-term half-hourly measurement of soil CO<sub>2</sub> concentration and  
695 soil respiration in a temperate deciduous forest, Journal of Geophysical Research, 108, 4631,  
696 <https://doi.org/10.1029/2003JD003766>, 2003.

697 Holtum, J. and Winter, K.: Are plants growing close to the floors of tropical forests exposed to markedly  
698 elevated concentrations of carbon dioxide?, Australian Journal of Botany, 49, 629-636,  
699 <https://doi.org/10.1071/BT00054>, 2001.

700 Jones, H. G.: Plants and Microclimate, Cambridge University Press, Cambridge, 1992.

701 Keeling, C. D.: The concentration and isotopic abundances of atmospheric carbon dioxide in rural areas,  
702 Geochimica et Cosmochimica Acta, 13, 322-334, [https://doi.org/10.1016/0016-7037\(58\)90033-](https://doi.org/10.1016/0016-7037(58)90033-4)  
703 [4](https://doi.org/10.1016/0016-7037(58)90033-4), 1958.

704 Konrad, W., Roth-Nebelsick, A., and Grein, M.: Modelling of stomatal density response to atmospheric  
705 CO<sub>2</sub>, Journal of Theoretical Biology, 253, 638-658, <https://doi.org/10.1016/j.jtbi.2008.03.032>,  
706 2008.

707 Konrad, W., Katul, G., Roth-Nebelsick, A., and Grein, M.: A reduced order model to analytically infer  
708 atmospheric CO<sub>2</sub> concentration from stomatal and climate data, Advances in Water Resources,  
709 104, 145-157, <https://doi.org/10.1016/j.advwatres.2017.03.018>, 2017.

710 Kowalczyk, J. B., Royer, D. L., Miller, I. M., Anderson, C. W., Beerling, D. J., Franks, P. J., Grein, M.,  
711 Konrad, W., Roth-Nebelsick, A., Bowring, S. A., Johnson, K. R., and Ramezani, J.: Multiple proxy  
712 estimates of atmospheric CO<sub>2</sub> from an early Paleocene rainforest, Paleogeography and  
713 Paleoclimatology, 33, 1427-1438, <https://doi.org/10.1029/2018PA003356>, 2018.

714 Kürschner, W. M.: The anatomical diversity of recent and fossil leaves of the durmast oak (*Quercus*  
715 *petraea* Lieblein/*Q. pseudocastanea* Goepfert)-implications for their use as biosensors of  
716 palaeoatmospheric CO<sub>2</sub> levels, Review of Palaeobotany and Palynology, 96, 1-30,  
717 [https://doi.org/10.1016/S0034-6667\(96\)00051-6](https://doi.org/10.1016/S0034-6667(96)00051-6), 1997.

718 Kuznetsova, A., Brockhoff, P. B., and Christensen, R. H. B.: lmerTest package: tests in linear mixed effects  
719 models, Journal of Statistical Software, 82, <https://doi.org/10.18637/jss.v082.i13>, 2017.

720 Lei, X., Du, Z., Du, B., Zhang, M., and Sun, B.: Middle Cretaceous pCO<sub>2</sub> variation in Yumen, Gansu  
721 Province and its response to the climate events, Acta Geologica Sinica, 92, 801-813,  
722 <https://doi.org/doi:10.1111/1755-6724.13555>, 2018.

723 Lenton, T. M., Daines, S. J., and Mills, B. J. W.: COPSE reloaded: an improved model of biogeochemical  
724 cycling over Phanerozoic time, Earth-Science Reviews, 178, 1-28,  
725 <https://doi.org/10.1016/j.earscirev.2017.12.004>, 2018.

726 Lloyd, J., Kruijt, B., Hollinger, D. Y., Grace, J., Francey, R. J., Wong, S.-C., Kelliher, F. M., Miranda, A. C.,  
727 Farquhar, G. D., and Gash, J.: Vegetation effects on the isotopic composition of atmospheric CO<sub>2</sub>  
728 at local and regional scales: theoretical aspects and a comparison between rain forest in  
729 Amazonia and a boreal forest in Siberia, Australian Journal of Plant Physiology, 23, 371-399,  
730 <https://doi.org/10.1071/PP9960371>, 1996.

731 Londoño, L., Royer, D. L., Jaramillo, C., Escobar, J., Foster, D. A., Cárdenas-Rozo, A. L., and Wood, A.:  
732 Early Miocene CO<sub>2</sub> estimates from a Neotropical fossil assemblage exceed 400 ppm, American  
733 Journal of Botany, 105, 1929-1937, <https://doi.org/10.1002/ajb2.1187>, 2018.

734 Marrero, T. R. and Mason, E. A.: Gaseous diffusion coefficients, *Journal of Physical and Chemical*  
735 *Reference Data*, 1, 3-118, <https://doi.org/10.1063/1.3253094>, 1972.

736 Maxbauer, D. P., Royer, D. L., and LePage, B. A.: High Arctic forests during the middle Eocene supported  
737 by moderate levels of atmospheric CO<sub>2</sub>, *Geology*, 42, 1027-1030,  
738 <https://doi.org/10.1130/g36014.1>, 2014.

739 McElwain, J. C.: Do fossil plants signal palaeoatmospheric CO<sub>2</sub> concentration in the geological past?,  
740 *Philosophical Transactions of the Royal Society London B*, 353, 83-96,  
741 <https://doi.org/10.1098/rstb.1998.0193>, 1998.

742 McElwain, J. C. and Chaloner, W. G.: Stomatal density and index of fossil plants track atmospheric  
743 carbon dioxide in the Palaeozoic, *Annals of Botany*, 76, 389-395,  
744 <https://doi.org/10.1006/anbo.1995.1112>, 1995.

745 McElwain, J. C. and Chaloner, W. G.: The fossil cuticle as a skeletal record of environmental change,  
746 *Palaios*, 11, 376-388, <https://doi.org/10.2307/3515247>, 1996.

747 McElwain, J. C., Montañez, I., White, J. D., Wilson, J. P., and Yiotis, C.: Was atmospheric CO<sub>2</sub> capped at  
748 1000 ppm over the past 300 million years?, *Palaeogeography Palaeoclimatology Palaeoecology*,  
749 441, 653-658, <https://doi.org/http://dx.doi.org/10.1016/j.palaeo.2015.10.017>, 2016.

750 Medina, E., Montes, G., Cuevas, E., and Rokzandic, Z.: Profiles of CO<sub>2</sub> concentration and δ<sup>13</sup>C values in  
751 tropical rain forests of the upper Rio Negro Basin, Venezuela, *Journal of Tropical Ecology*, 2, 207-  
752 217, <https://doi.org/10.1017/S0266467400000821>, 1986.

753 Michaletz, S. T., Weiser, M. D., Zhou, J., Kaspari, M., Helliker, B. R., and Enquist, B. J.: Plant  
754 thermoregulation: energetics, trait-environment interactions, and carbon economics, *Trends in*  
755 *Ecology & Evolution*, 30, 714-724, <https://doi.org/10.1016/j.tree.2015.09.006>, 2015.

756 Michaletz, S. T., Weiser, M. D., McDowell, N. G., Zhou, J., Kaspari, M., Helliker, B. R., and Enquist, B. J.:  
757 The energetic and carbon economic origins of leaf thermoregulation, *Nature Plants*, 2, 16129,  
758 <https://doi.org/10.1038/nplants.2016.129>, 2016.

759 Milligan, J. N., Royer, D. L., Franks, P. J., Upchurch, G. R., and McKee, M. L.: No evidence for a large  
760 atmospheric CO<sub>2</sub> spike across the Cretaceous-Paleogene boundary, *Geophysical Research*  
761 *Letters*, in review.

762 Mills, B. J. W., Belcher, C. M., Lenton, T. M., and Newton, R. J.: A modeling case for high atmospheric  
763 oxygen concentrations during the Mesozoic and Cenozoic, *Geology*, 44, 1023-1026,  
764 <https://doi.org/10.1130/g38231.1>, 2016.

765 Montañez, I. P., McElwain, J. C., Poulsen, C. J., White, J. D., DiMichele, W. A., Wilson, J. P., Griggs, G., and  
766 Hren, M. T.: Climate, p<sub>CO2</sub> and terrestrial carbon cycle linkages during late Palaeozoic glacial-  
767 interglacial cycles, *Nature Geoscience*, 9, 824-828, <https://doi.org/10.1038/ngeo2822>, 2016.

768 Munger, W. and Hadley, J.: CO<sub>2</sub> profile at Harvard Forest HEM and LPH towers since 2009, Harvard  
769 Forest Data Archive: HF197,  
770 <http://harvardforest.fas.harvard.edu:8080/exist/apps/datasets/showData.html?id=hf197>, 2017.

771 Porter, A. S., Yiotis, C., Montañez, I. P., and McElwain, J. C.: Evolutionary differences in Δ<sup>13</sup>C detected  
772 between spore and seed bearing plants following exposure to a range of atmospheric O<sub>2</sub>:CO<sub>2</sub>  
773 ratios: implications for paleoatmosphere reconstruction, *Geochimica et Cosmochimica Acta*,  
774 213, 517-533, <https://doi.org/10.1016/j.gca.2017.07.007>, 2017.

775 Quay, P., King, S., Wilbur, D., Wofsy, S., and Rickey, J.: <sup>13</sup>C/<sup>12</sup>C of atmospheric CO<sub>2</sub> in the Amazon Basin:  
776 forest and river sources, *Journal of Geophysical Research*, 94, 18327-18336,  
777 <https://doi.org/10.1029/JD094iD15p18327>, 1989.

778 R Core Team: R: A Language and Environment for Statistical Computing, R Foundation for Statistical  
779 Computing, Vienna, Austria, <https://www.R-project.org/>, 2016.

780 Reichgelt, T., D'Andrea, W. J., and Fox, B. R. S.: Abrupt plant physiological changes in southern New  
781 Zealand at the termination of the Mi-1 event reflect shifts in hydroclimate and  $p\text{CO}_2$ , *Earth and*  
782 *Planetary Science Letters*, 455, 115-124, <https://doi.org/10.1016/j.epsl.2016.09.026>, 2016.

783 Richey, J. D., Upchurch, G. R., Montañez, I. P., Lomax, B. H., Suarez, M. B., Crout, N. M. J., Joeckel, R. M.,  
784 Ludvigson, G. A., and Smith, J. J.: Changes in  $\text{CO}_2$  during Ocean Anoxic Event 1d indicate  
785 similarities to other carbon cycle perturbations, *Earth and Planetary Science Letters*, 491, 172-  
786 182, <https://doi.org/10.1016/j.epsl.2018.03.035>, 2018.

787 Roeske, C. and O'Leary, M. H.: Carbon isotope effects on enzyme-catalyzed carboxylation of ribulose  
788 bisphosphate, *Biochemistry*, 23, 6275-6284, <https://doi.org/10.1021/bi00320a058>, 1984.

789 Roth-Nebelsick, A., Grein, M., Utescher, T., and Konrad, W.: Stomatal pore length change in leaves of  
790 *Eotrigonobalanus furcinervis* (Fagaceae) from the Late Eocene to the Latest Oligocene and its  
791 impact on gas exchange and  $\text{CO}_2$  reconstruction, *Review of Palaeobotany and Palynology*, 174,  
792 106-112, <https://doi.org/10.1016/j.revpalbo.2012.01.001>, 2012.

793 Roth-Nebelsick, A., Oehm, C., Grein, M., Utescher, T., Kunzmann, L., Friedrich, J.-P., and Konrad, W.:  
794 Stomatal density and index data of *Platanus neptuni* leaf fossils and their evaluation as a  $\text{CO}_2$   
795 proxy for the Oligocene, *Review of Palaeobotany and Palynology*, 206, 1-9,  
796 <https://doi.org/10.1016/j.revpalbo.2014.03.001>, 2014.

797 Roth, J. and Dilcher, D.: Some considerations in leaf size and leaf margin analysis of fossil leaves, *Courier*  
798 *Forschungsinstitut Senckenberg*, 30, 165-171, 1978.

799 Royer, D. L.: Stomatal density and stomatal index as indicators of paleoatmospheric  $\text{CO}_2$  concentration,  
800 *Review of Palaeobotany and Palynology*, 114, 1-28, [https://doi.org/10.1016/S0034-](https://doi.org/10.1016/S0034-6667(00)00074-9)  
801 [6667\(00\)00074-9](https://doi.org/10.1016/S0034-6667(00)00074-9), 2001.

802 Royer, D. L. and Hren, M. T.: Carbon isotopic fractionation between whole leaves and cuticle, *Palaios*, 32,  
803 199-205, <https://doi.org/10.2110/palo.2016.073>, 2017.

804 Royer, D. L., Miller, I. M., Peppe, D. J., and Hickey, L. J.: Leaf economic traits from fossils support a weedy  
805 habit for early angiosperms, *American Journal of Botany*, 97, 438-445,  
806 <https://doi.org/10.3732/ajb.0900290>, 2010.

807 Sack, L. and Scoffoni, C.: Leaf venation: structure, function, development, evolution, ecology and  
808 applications in the past, present and future, *New Phytologist*, 198, 983-1000,  
809 <https://doi.org/10.1111/nph.12253>, 2013.

810 Sack, L., Melcher, P. J., Liu, W. H., Middleton, E., and Pardee, T.: How strong is intracanalopy leaf plasticity  
811 in temperate deciduous trees?, *American Journal of Botany*, 93, 829-839,  
812 <https://doi.org/10.3732/ajb.93.6.829>, 2006.

813 Schubert, B. A. and Jahren, A. H.: Incorporating the effects of photorespiration into terrestrial  
814 paleoclimate reconstruction, *Earth-Science Reviews*, 177, 637-642,  
815 <https://doi.org/10.1016/j.earscirev.2017.12.008>, 2018.

816 Smith, R. Y., Greenwood, D. R., and Basinger, J. F.: Estimating paleoatmospheric  $p\text{CO}_2$  during the Early  
817 Eocene Climatic Optimum from stomatal frequency of *Ginkgo*, Okanagan Highlands, British  
818 Columbia, Canada, *Palaeogeography Palaeoclimatology Palaeoecology*, 293, 120-131,  
819 <https://doi.org/10.1016/j.palaeo.2010.05.006>, 2010.

820 Song, X., Barbour, M. M., Saurer, M., and Helliker, B. R.: Examining the large-scale convergence of  
821 photosynthesis-weighted tree leaf temperatures through stable oxygen isotope analysis of  
822 multiple data sets, *New Phytologist*, 192, 912-924, [https://doi.org/10.1111/j.1469-](https://doi.org/10.1111/j.1469-8137.2011.03851.x)  
823 [8137.2011.03851.x](https://doi.org/10.1111/j.1469-8137.2011.03851.x), 2011.

824 Sotta, E. D., Meir, P., Malhi, Y., Donato nobre, A., Hodnett, M., and Grace, J.: Soil  $\text{CO}_2$  efflux in a tropical  
825 forest in the central Amazon, *Global Change Biology*, 10, 601-617,  
826 <https://doi.org/10.1111/j.1529-8817.2003.00761.x>, 2004.

827 Spicer, R. A.: The importance of depositional sorting to the biostratigraphy of plant megafossils, in:  
828 Biostratigraphy of Fossil Plants: Successional and Paleoecological Analyses, edited by: Dilcher, D.  
829 and Taylor, T., Dowden, Hutchinson, and Ross, Stroudsburg, PA, 171-183, 1980.

830 Sternberg, L., Mulkey, S. S., and Wright, S. J.: Ecological interpretation of leaf carbon isotope ratios:  
831 influence of respired carbon dioxide, *Ecology*, 70, 1317-1324, <https://doi.org/10.2307/1938191>,  
832 1989.

833 Stevens, P. F.: Angiosperm Phylogeny Website. Version 13., [www.mobot.org/MOBOT/research/APweb/](http://www.mobot.org/MOBOT/research/APweb/),  
834 2001 onwards.

835 Talbert, C. M. and Holch, A. E.: A study of the lobing of sun and shade leaves, *Ecology*, 38, 655-658,  
836 <https://doi.org/10.2307/1943135>, 1957.

837 Tcherkez, G.: How large is the carbon isotope fractionation of the photorespiratory enzyme glycine  
838 decarboxylase?, *Functional Plant Biology*, 33, 911-920, <https://doi.org/10.1071/FP06098>, 2006.

839 Tesfamichael, T., Jacobs, B., Tabor, N., Michel, L., Currano, E., Feseha, M., Barclay, R., Kappelman, J., and  
840 Schmitz, M.: Settling the issue of “decoupling” between atmospheric carbon dioxide and global  
841 temperature: [CO<sub>2</sub>]<sub>atm</sub> reconstructions across the warming Paleogene-Neogene divide, *Geology*,  
842 45, 999-1002, <https://doi.org/10.1130/G39048.1>, 2017.

843 Tipple, B. J., Meyers, S. R., and Pagani, M.: Carbon isotope ratio of Cenozoic CO<sub>2</sub>: a comparative  
844 evaluation of available geochemical proxies, *Paleoceanography*, 25, PA3202,  
845 <https://doi.org/10.1029/2009PA001851>, 2010.

846 Uhl, D. and Mosbrugger, V.: Leaf venation density as a climate and environmental proxy: a critical review  
847 and new data, *Palaeogeography Palaeoclimatology Palaeoecology*, 149, 15-26,  
848 [https://doi.org/10.1016/S0031-0182\(98\)00189-8](https://doi.org/10.1016/S0031-0182(98)00189-8), 1999.

849 Von Caemmerer, S.: *Biochemical Models of Leaf Photosynthesis*, CSIRO Publishing, Collingwood,  
850 Australia, 2000.

851 Wang, Y., Ito, A., Huang, Y., Fukushima, T., Wakamatsu, N., and Momohara, A.: Reconstruction of  
852 altitudinal transportation range of leaves based on stomatal evidence: an example of the Early  
853 Pleistocene *Fagus* leaf fossils from central Japan, *Palaeogeography, Palaeoclimatology,*  
854 *Palaeoecology*, 505, 317-325, <https://doi.org/10.1016/j.palaeo.2018.06.011>, 2018.

855 Woodward, F. I.: Stomatal numbers are sensitive to increases in CO<sub>2</sub> from pre-industrial levels, *Nature*,  
856 327, 617-618, <https://doi.org/10.1038/327617a0>, 1987.

857 Woodward, F. I. and Kelly, C. K.: The influence of CO<sub>2</sub> concentration on stomatal density, *New*  
858 *Phytologist*, 131, 311-327, <https://doi.org/10.1111/j.1469-8137.1995.tb03067.x>, 1995.

859 Wynn, J. G.: Towards a physically based model of CO<sub>2</sub>-induced stomatal frequency response, *New*  
860 *Phytologist*, 157, 391-398, <https://doi.org/10.1046/j.1469-8137.2003.00702.x>, 2003.

1 **No evidence for a large atmospheric CO<sub>2</sub> spike across the Cretaceous-Paleogene**  
2 **boundary**

3

4 **Joseph N. Milligan<sup>1,2</sup>, Dana L. Royer<sup>1</sup>, Peter J. Franks<sup>3</sup>, Garland R. Upchurch<sup>4</sup>, Melissa L.**  
5 **McKee<sup>1</sup>**

6 <sup>1</sup>Department of Earth and Environmental Sciences, Wesleyan University, Middletown,  
7 Connecticut, USA.

8 <sup>2</sup>Department of Geology, Baylor University, Waco, TX, USA.

9 <sup>3</sup>School of Life and Environmental Sciences, University of Sydney, Sydney, New South Wales,  
10 Australia.

11 <sup>4</sup>Department of Biology, Texas State University, San Marcos, TX, USA.

12 Corresponding author: Joseph Milligan (Joseph\_Milligan@baylor.edu)

13 **Key Points:**

- 14       • Understanding atmospheric CO<sub>2</sub> across the Cretaceous-Paleogene boundary has been  
15       limited due to deficiencies in existing records
- 16       • Our study highlights the utility of a proxy based on leaf gas-exchange principles
- 17       • We record a small transient rise in atmospheric CO<sub>2</sub> that is more in line with modeled  
18       estimates of both Deccan volcanism and a bolide impact

19 **Abstract**

20           Currently there is only one paleo-CO<sub>2</sub> record from plant macrofossils that has sufficient  
21 stratigraphic resolution to potentially capture a transient spike related to rapid carbon release at  
22 the Cretaceous-Paleogene (K-Pg) boundary. Unfortunately, the associated measurements of  
23 stomatal index are off-calibration, leading to a qualitative interpretation of >2300 ppm CO<sub>2</sub>. Here  
24 we re-evaluate this record with a paleo-CO<sub>2</sub> proxy based on leaf gas-exchange principles. We  
25 also test the proxy with three living species grown at 500 and 1000 ppm CO<sub>2</sub>, including the  
26 nearest living relative of the K-Pg fern, and find a mean error rate of ~22%, which is comparable  
27 to other leading paleo-CO<sub>2</sub> proxies. Our fossils record a ~250 ppm increase in CO<sub>2</sub> across the K-  
28 Pg boundary from ~625 to ~875 ppm. A small CO<sub>2</sub> spike associated with the end-Cretaceous  
29 mass extinction is consistent with many temperature records and with carbon cycle modeling of  
30 Deccan volcanism and the meteorite impact.

31 **Plain Language Summary**

32           Currently there is only one paleo-CO<sub>2</sub> record close enough to the Cretaceous-Paleogene  
33 (K-Pg) boundary to record a rapid release in atmospheric CO<sub>2</sub>, a greenhouse gas. This record is  
34 based on the stomatal frequencies of fern fossils at the K-Pg boundary and *Ginkgo* fossils before  
35 and after the boundary. Unfortunately, due to deficiencies with the method, the CO<sub>2</sub> inferences  
36 are only qualitative. Here we look at the same fossils with a proxy based on leaf gas-exchange  
37 principles (i.e. photosynthesis). We first test the proxy with three living species grown at 500 and  
38 1000 ppm CO<sub>2</sub>, including the nearest living relative of the K-Pg fern, and find a comparable  
39 accuracy to other quantitative paleo-CO<sub>2</sub> proxies. The fossils record a modest ~250 ppm increase  
40 in CO<sub>2</sub> across the K-Pg boundary. These estimates are consistent with most temperature records  
41 and with carbon cycle modeling of Deccan volcanism and the meteorite impact.



## 42 **1 Introduction**

43           The Cretaceous–Paleogene (K-Pg) boundary ~66 Ma marks one of the largest mass  
44 extinctions in Earth’s history (Alroy, 2008; Brusatte et al., 2015; McElwain and Punyasena,  
45 2007; Raup and Sepkoski, 1982). The concentration of atmospheric CO<sub>2</sub> may have risen abruptly  
46 at this time, contributing to the biological upheaval (Beerling et al., 2002). Removal of an  
47 instantaneous release of CO<sub>2</sub> to the atmosphere typically requires up to 100-200 kyrs, following  
48 exponential decay due to silicate weathering (Archer, 2005; Colbourn et al., 2015; Schaller et al.,  
49 2011; Zeebe and Zachos, 2013). Adequate constraints on atmospheric CO<sub>2</sub> from proxy records  
50 during this critical period have been missing, mostly because of a lack in sufficient stratigraphic  
51 resolution to definitively identify individual records occurring <100 kyrs after the extinction  
52 event. This is because either the stratigraphic section is too coarse to resolve 100 kyrs of time  
53 (Steinhorsdottir et al., 2016) or because definitive markers of the boundary (e.g., iridium spike,  
54 presence of microspherules) are missing (Huang et al., 2013; Nordt et al., 2003; Zhang et al.,  
55 2018).

56           One exception is the study of Beerling et al. (2002), who used stomatal indices (SI,  
57 stomatal density normalized by the number of epidermal cells) to estimate CO<sub>2</sub> from fern  
58 macrofossils (aff. *Stenochlaena*) that occur 5-25 cm above the K-Pg boundary in the Raton  
59 Basin, New Mexico. In this stratigraphic section, the K-Pg boundary is identified by an iridium  
60 spike and shocked quartz, and the fossils come from sediments that contain, and lie directly  
61 above, the fern spore spike. This fern spike is present across the globe (Vajda et al., 2001) and  
62 likely occurred within 10<sup>3</sup> yrs after the K-Pg boundary (Clyde et al., 2016). Thus, the aff.  
63 *Stenochlaena* fossils should record any transient rise in atmospheric CO<sub>2</sub> associated with the  
64 Chicxulub impact and K-Pg boundary. Indeed, the fossils likely capture close to the peak in CO<sub>2</sub>

65 change because after an instantaneous release, CO<sub>2</sub> will remain significantly elevated for  
 66 hundreds of years (Solomon et al., 2009; Zeebe, 2013). Unfortunately, the measured stomatal  
 67 indices fall well below the present-day calibration of *S. palustris*, leading Beerling et al. (2002)  
 68 to interpret a CO<sub>2</sub> concentration that exceeded the calibrated space (>2300 ppm), considerably  
 69 higher than latest Cretaceous and earliest Paleocene CO<sub>2</sub> values of ~350-550 ppm inferred from  
 70 *Ginkgo* fossils (Beerling et al., 2002; 2009). The Beerling et al. (2002) study thus suggests a very  
 71 large, but poorly constrained, CO<sub>2</sub> pulse.

72 Leaf gas-exchange models are an alternative to stomatal density (SD) and SI proxies for  
 73 estimating paleo-CO<sub>2</sub> concentration (Franks et al., 2014; Konrad et al., 2008, 2017). The model  
 74 developed by Franks et al. (2014) depends on the well-established relationship between the rate  
 75 of CO<sub>2</sub> assimilation of plants (A), leaf conductance to CO<sub>2</sub> (g<sub>ctot</sub>), and the difference between  
 76 atmospheric (c<sub>a</sub>) and leaf intercellular CO<sub>2</sub> (c<sub>i</sub>) (Farquhar and Sharkey, 1982):

$$77 \quad A = g_{ctot}(c_a - c_i) \quad (1)$$

78 Equation 1 can be rearranged to solve for atmospheric CO<sub>2</sub> (Equation 2). The three input  
 79 variables needed are the average assimilation rate (determined from a nearest living relative),  
 80 average total leaf conductance (determined largely from SD and stomatal size measured on the  
 81 fossil), and average c<sub>i</sub>/c<sub>a</sub> (determined from the fossil leaf and air carbon isotopic composition  
 82 combined with knowledge of the fractionation process) (Franks et al., 2014):

$$83 \quad c_a = \frac{A}{g_{ctot}(1 - c_i/c_a)} \quad (2)$$

84 The model has been used to reconstruct CO<sub>2</sub> during the Phanerozoic (Franks et al., 2014),  
 85 including the late Paleozoic (Montañez et al., 2016), middle Cretaceous (Richey et al., 2018),  
 86 Late Cretaceous (Martínez et al., 2018), early Paleocene (Kowalczyk et al., 2018), middle

87 Eocene (Maxbauer et al., 2014; Wolfe et al., 2017), Oligocene-Miocene boundary (Reichgelt et  
88 al., 2016; Tesfamichael et al., 2017) and early Miocene (Londoño et al., 2018).

89 Leaf gas-exchange models provide at least five crucial advantages over other stomatal  
90 approaches: (1) they are based mechanistically on physiological principles, not empirical,  
91 species-specific calibrations; (2) measurements of SD, a component of  $g_{\text{ctot}}$ , are typically more  
92 reliable and easier to make than SI because epidermal cells can be difficult to count (Barclay and  
93 Wing, 2016); (3) they are less sensitive to the saturating effect that can limit other stomatal  
94 methods to <500-1000 ppm CO<sub>2</sub> (e.g. Doria et al., 2011); (4) they can be applied to most  
95 subaerial leaves from C<sub>3</sub> species, regardless of age or taxonomy; and (5) they are not restricted to  
96 species whose SD or SI is sensitive to CO<sub>2</sub> because the models have multiple physiological  
97 inputs with well-understood sensitivities to CO<sub>2</sub>. Importantly, these gas-exchange methods open  
98 up much of the paleobotanical record for quantitative CO<sub>2</sub> inference, not just to fossil taxa that  
99 are still living today. While the Franks et al. (2014) model shows promise, more extensive testing  
100 will improve confidence in the CO<sub>2</sub> estimates. Specifically, model validation with extant species  
101 has been limited to mostly angiosperms and a few gymnosperms, neglecting major clades such  
102 as ferns and lycophytes. Additionally, the model has been tested at elevated CO<sub>2</sub> on only a few  
103 species (Franks et al., 2014; Londoño et al., 2018).

104 Here we test the model using growth-chamber experiments at elevated CO<sub>2</sub> (500 and  
105 1000 ppm) for two ferns (*Osmundastrum cinnamomeum* (L.) C. Presl and a close living relative  
106 to the K-Pg fern, *Stenochlaena palustris* (Burm.f.) Bedd.), and one conifer (*Cedrus deodara*  
107 (Roxb.) Loud. We then use the same fossils of aff. *Stenochlaena* and *Ginkgo* from Beerling et al.  
108 (2002) to re-evaluate atmospheric CO<sub>2</sub> across the K-Pg boundary using the gas-exchange model  
109 of Franks et al. (2014).

110 **2 Materials and methods**

111 For detailed methods and all data, see the supporting information.

112 *2.1 Growth chamber experiments*

113 All plants were potted with Premier Horticulture "Pro-mix" Bx with Mycorise and grown  
114 in two Conviron E7/2 growth chambers. Plants were watered to field capacity daily and given  
115 Scotts all-purpose flower and vegetable fertilizer (10-10-10) every two months. The chamber  
116 conditions were set to a 17-hour photoperiod with a 30-minute simulated dawn and dusk.  
117 Temperature was  $25 \pm 0.2^\circ\text{C}$  ( $1\sigma$ ) during the day and  $20 \pm 1^\circ\text{C}$  ( $1\sigma$ ) at night. The relative  
118 humidity was  $84 \pm 5\%$  ( $1\sigma$ ) and the  $\text{CO}_2$  concentration was either  $500 \pm 25$  ( $1\sigma$ ) or  $1000 \pm 15$   
119 ( $1\sigma$ ) ppm. Growth light levels (photosynthetically active radiation, or PAR) varied between 100-  
120  $500 \mu\text{mol m}^{-2} \text{s}^{-1}$  depending on plant height. Plants were rotated between the two chambers every  
121 two weeks to negate any chamber effects (e.g., Porter et al., 2015).

122 *2.2 Fossil leaves*

123 The fossils come from Beerling et al. (2002). The aff. *Stenochlaena* fossils were collected  
124 at the Clear Creek South locality in the Raton Basin, New Mexico (Wolfe and Upchurch, 1987).  
125 The fossils represent an extinct (and currently unnamed) genus related to *Stenochlaena* (Wolfe  
126 and Upchurch, 1987), with identification based on venation, tooth and frond architecture, and  
127 stomatal anatomy, especially maceration-resistant cutin lamellae on the guard cells (Beerling et  
128 al., 2002; Wolfe and Upchurch, 1987). The stratigraphic interval containing the fern fossils  
129 includes the top of the fern spore spike and the overlying level where dicot pollen returns to  
130 dominance.

131 The latest Cretaceous and earliest Paleocene *Ginkgo adiantoides* fossils were obtained by  
132 loan from the Denver Museum of Nature and Science (DMNH) and the Yale Peabody Museum

133 (YPM), respectively. The Cretaceous fossils come from the Hell Creek Formation in the  
134 Williston Basin of North Dakota (DMNH site 566), 33.5 m below the K-Pg boundary (Johnson,  
135 2002). Based on constraints from geochronology, magnetostratigraphy, and sedimentation rates,  
136 Hicks et al. (2002) consider the locality 0.5 Myrs older than the K-Pg boundary. The early  
137 Paleocene fossils come from the Fort Union Formation in the Bighorn Basin of Wyoming (YPM  
138 locality 7659), 4 m above the K-Pg boundary; based on sedimentation rates, Wing et al. (1995)  
139 interpret the site to post-date the K-Pg boundary by 0.5 Myrs. We assume a K-Pg boundary age  
140 of 66 Ma (Gradstein et al., 2012; Renne et al., 2013).

### 141 *2.3 Leaf gas-exchange model*

142 The Franks et al. (2014) leaf gas-exchange model has 16 inputs that are used to calculate  
143 the average assimilation rate, total leaf conductance, and  $c_i/c_a$  (Equation 2). When possible, we  
144 measured the inputs directly, including SD, stomatal pore length, single guard cell width, and  
145 leaf  $\delta^{13}\text{C}$  (Table S1). For living plants, the assimilation rate, A, and operational stomatal  
146 conductance to  $\text{CO}_2$ ,  $g_{c(\text{op})}$ , were also measured with a LI-COR 6400 portable photosynthesis  
147 system. These measurements were made under environmental conditions identical (or nearly  
148 identical) to the growth chamber environment. Leaves first equilibrated inside the leaf chamber  
149 for 10 to 30 minutes. All reported results are means of the most stable individual measurements  
150 (typically <5% variance across measurements).

151 For the fossil leaves, nearest living relatives were used to assign taxon-specific values of  
152  $A_0$  (assimilation rate at a known  $\text{CO}_2$  concentration) and  $g_{c(\text{op})}/g_{c(\text{max})}$  (ratio of operational to  
153 maximum stomatal conductance to  $\text{CO}_2$ ). For aff. *Stenochlaena*, values come from *S. palustris*  
154 reported here; for *G. adiantoides*, values come from field-grown *G. biloba* at ~400 ppm  $\text{CO}_2$   
155 (Kowalczyk et al., 2018). For other inputs not directly measured, we used the recommended

156 values from Franks et al. (2014) or appropriate values from the literature (see Dataset S1). To  
157 solve for atmospheric CO<sub>2</sub>, we use the Kowalczyk et al. (2018) code written in R (v.3.4.4; R core  
158 team, 2018).

159 As with the Beerling et al. (2002) study, our atmospheric CO<sub>2</sub> reconstruction comes from  
160 two different species at three different localities. Because this potentially introduces species and  
161 environmental effects, we performed a sensitivity analysis by estimating CO<sub>2</sub> after sequentially  
162 varying each input parameter across a range typical for C<sub>3</sub> plants. Consistent with previous work  
163 (Kowalczyk et al., 2018; Maxbauer et al., 2014; McElwain et al., 2016) we find that among the  
164 inputs that cannot be measured directly on fossils, changes in A<sub>0</sub> and  $g_{c(op)}/g_{c(max)}$  have the biggest  
165 impact on estimated CO<sub>2</sub> (Figure S16). As such, we explored how different value choices for  
166 these inputs may affect our CO<sub>2</sub> estimates. For example, because a one-step change in CO<sub>2</sub> may  
167 not induce the same physiological response as a slow-and-steady CO<sub>2</sub> increase over geological  
168 time, we evaluated the model both with the measured physiological inputs (discussed earlier) and  
169 generic values recommended by Franks et al. (2014) (Table S2).

170 We note that the Franks et al. (2014) leaf gas-exchange model is based on leaf  
171 temperature, not air temperature. Both theory (Michaletz et al., 2015; Michaletz et al., 2016) and  
172 observations (Helliker and Richter, 2008; Song et al., 2011) indicate that the control of leaf gas  
173 exchange leads to relatively stable assimilation-weighted leaf temperatures (~19-25 °C from  
174 temperate to tropical regions; i.e., thermoregulation). Thus, despite significant changes (e.g.,  
175 several degrees) in global mean air temperature, as often observed across the K-Pg boundary,  
176 daytime leaf temperature during the growing season should stay relatively constant. If instead  
177 leaf temperature did vary substantially, it could have mixed effects on many model inputs (A,  
178  $g_{c(op)}/g_{c(max)}$ , SD, stomatal size,  $c_i/c_a$ ); for example, an increase in A with no changes to other

179 inputs will cause an equally proportional increase in estimated CO<sub>2</sub> (Figure S16B). While  
180 assimilation rates can increase with leaf temperature within seconds to hours (e.g. Berry and  
181 Björkman, 1980); C<sub>3</sub> plants generally exhibit stable assimilation rates when acclimated to a range  
182 of growth temperatures (i.e., temperature homeostasis of photosynthesis, Yamori et al., 2014).  
183 With regards to the Franks et al. (2014) model, tests on six species grown at 20 and 28 °C air  
184 temperature show only a mild effect on the ability of the model to estimate CO<sub>2</sub> (Royer et al.,  
185 2018). For these reasons, we argue that changes in mean global temperature probably have little  
186 impact on the reliability of our CO<sub>2</sub> reconstructions.

#### 187 *2.4 Statistics*

188 A one-sample Kolmogorov-Smirnov test identified that most of our inputs did not have  
189 normal distributions (Dataset S1). Thus, for our experiments, we used a two-sample  
190 Kolmogorov-Smirnov test to test for differences between CO<sub>2</sub> treatments in the inputs. All  
191 analyses were done within R and performed at the plant level.

### 192 **3 Results and Discussion**

#### 193 *3.1 Growth chamber experiments*

194 The median CO<sub>2</sub> estimates for the three living species in the 500 ppm CO<sub>2</sub> treatment  
195 range from 584-686 ppm, and in the 1000 ppm treatment from 1016-1442 ppm (Figure 1; Table  
196 S2). Across all species, the 500 and 1000 ppm CO<sub>2</sub> treatments have a mean error rate  
197  $[(\text{estimated CO}_2 - \text{observed CO}_2) / (\text{observed CO}_2)]$  of ~25% and ~19%, respectively. This is  
198 higher than elevated CO<sub>2</sub> experiments of *Wollemia nobilis* at 480 and 1270 ppm (7%; Franks et  
199 al., 2014), but is comparable to other paleo-CO<sub>2</sub> proxies at present day CO<sub>2</sub> such as alkenones  
200 (12.4%; Pagani, 2002), boron isotopes (8.2%; Henehan et al., 2013; Hönisch and Hemming,  
201 2005), and pedogenic carbonates (67%; Ekart et al., 1999). Additionally, the precision of  
202 estimates within this study are comparable or better than other paleo-CO<sub>2</sub> proxies, especially at

203 elevated CO<sub>2</sub> (Beerling et al., 2009; Montañez et al., 2011; Royer, 2014). Using the generic  
204 values recommended by Franks et al. (2014) for A<sub>0</sub> and g<sub>c(op)/g<sub>c(max)</sub>, median CO<sub>2</sub> estimates  
205 increase for *S. palustris* and *O. cinnamomeum* while decreasing for *C. deodara*, with a mean  
206 error rate of 44% and 21% for the 500 and 1000 ppm CO<sub>2</sub> treatments (Table S2). Note, however,  
207 that the generic values recommended by Franks et al. (2014) were obtained for field conditions  
208 which may differ slightly from growth chambers. Plants in growth chambers typically  
209 experience lower light and higher humidity, which affect A<sub>0</sub> and g<sub>c(op)/g<sub>c(max)</sub> via g<sub>c(op)</sub>.</sub></sub>

210 *O. cinnamomeum* and *C. deodara* show no significant differences to CO<sub>2</sub> in SD, guard  
211 cell length, stomatal pore length, single guard cell width, and g<sub>c(op)/g<sub>c(max)</sub> (P>0.05), but both have  
212 significantly higher A at 1000 ppm CO<sub>2</sub> (P=0.03; P=0.02; Figure 2). SD in *S. palustris* declines  
213 significantly by 21% at high growth CO<sub>2</sub> (P=0.048), but with no significant change in guard cell  
214 length, stomatal pore length, or guard cell width (P>0.05). *C. deodara* and *S. palustris* exhibit a  
215 significant increase in c<sub>i</sub>/c<sub>a</sub> at elevated CO<sub>2</sub> (P=0.004; P=0.048), while *O. cinnamomeum* does  
216 not.</sub>

217 The disparate physiological and morphological responses to CO<sub>2</sub> highlight an advantage  
218 of leaf gas-exchange proxies over other stomatal proxies. If SD or SI does not respond to CO<sub>2</sub>,  
219 then by definition the SD and SI methods cannot be used (see Reichgelt et al., 2016). For leaf  
220 gas-exchange models, this is not necessarily true if other inputs do respond to CO<sub>2</sub>. This is in fact  
221 the case with *O. cinnamomeum* and *C. deodara*, which produced reasonable CO<sub>2</sub> estimates for  
222 both treatments despite no changes in SD. Part of the issue with the other stomatal proxies is that  
223 they depend on a calibrated response, and the timescale associated with these responses  
224 (typically months to years) may not be sufficiently long, especially at higher-than-present CO<sub>2</sub>  
225 concentrations (Royer, 2001; see multi-year response from Hincke et al., 2016).



226 3.2 K-Pg boundary CO<sub>2</sub>

227 The leaf gas-exchange estimates of CO<sub>2</sub> from *G. adiantoides* are similar for the Late  
228 Cretaceous (66.5 Ma; 624 ppm; 95% confidence interval 454-882 ppm) and early Paleocene  
229 (65.5 Ma; 630 ppm; 95% confidence interval 408-1181 ppm) (Figure 3; Table S2). The larger  
230 uncertainty with the Paleocene estimate is mostly due to having to model both stomatal pore  
231 length and single guard cell width because we were unable to measure them (Table S1). The leaf  
232 gas-exchange estimate of CO<sub>2</sub> from aff. *Stenochlaena* directly after the K-Pg boundary is 873  
233 ppm (95% confidence interval 550-1414 ppm). By comparison, the estimates from Beerling et al.  
234 (2002) (updated by Beerling et al., 2009) are 539 ppm for the Late Cretaceous, >2300 ppm for  
235 the fern layer, and 343 ppm for the early Paleocene.

236 It is possible that all three of our estimates are falsely-high because the model  
237 overestimates present-day CO<sub>2</sub> for *G. biloba* (Barclay and Wing, 2016; Kowalczyk et al., 2018;  
238 but see Franks et al., 2014) and *S. palustris* at both 500 and 1000 ppm CO<sub>2</sub> (Figure 1). The  
239 relative temporal patterns, though, are more likely to be robust. If we use the generic inputs for  
240  $A_0$  and  $g_{c(op)}/g_{c(max)}$  recommended by Franks et al. (2014), all three estimates increase by ~200-  
241 500 ppm (Table S2 and Figure 3), but the increase in CO<sub>2</sub> between the Late Cretaceous and fern  
242 layer does not change by very much (+250 ppm) and remains fundamentally different from the  
243 original interpretation of Beerling et al. (2002) (Figure 3).

244 A source of uncertainty for the aff. *Stenochlaena* CO<sub>2</sub> estimate is the atmospheric  $\delta^{13}C$   
245 directly at the K-Pg boundary, which affects the calculation of  $c_i/c_a$ . Measured carbon isotopic  
246 excursions at the K-Pg boundary range from 0 to -3‰ (Arens and Jahren, 2000; Beerling et al.,  
247 2001; Maruoka et al., 2007; Schimmelmann and DeNiro, 1984; Schulte et al., 2010). Where  
248 examined in detail, the excursion in terrestrial sections begins immediately above the K-Pg

249 boundary clay in the fern spike interval, with the most negative values in the early phase of dicot  
250 recovery, and a return to pre-excursion values no higher than 2-3 m up section (reviewed in  
251 Upchurch et al., 2007). For our initial modeling we assume -2‰ (Text S2). If we instead assume  
252 an excursion of 0‰, comparable to the value at the top of the K-Pg boundary clay, or -3‰, the  
253 median CO<sub>2</sub> is 1170 and 762 ppm, respectively. Neither of these changed estimates strongly  
254 affect our key interpretations.

255 Our CO<sub>2</sub> record implies a transient change of ~+250; if we take the extreme scenario of  
256 comparing the lower and upper bounds of the 95% confidence intervals, this change could range  
257 from -333 to +1032 ppm. Critically, we provide the first fully-bounded CO<sub>2</sub> estimate from the  
258 top of the fern spike interval, and thus likely from within the first 10<sup>3</sup> years after the bolide  
259 impact. Our *Ginkgo* estimates bracket the event by roughly 500 kyrs, meaning that we do not  
260 know the CO<sub>2</sub> concentration directly before the bolide impact. This is an important deficiency  
261 because global temperatures rose ~300 kyrs before the K-Pg boundary and subsequently fell  
262 leading up to the boundary (Barnet et al., 2017; Nordt et al., 2003; Petersen et al., 2016; Wilf et  
263 al., 2003; Zhang et al., 2018). Zhang et al. (2018) estimate with the pedogenic carbonate proxy a  
264 CO<sub>2</sub> concentration of 700 ppm 110 kyrs before the K-Pg boundary (Figure S17), suggesting that  
265 Deccan volcanism caused an elevation in CO<sub>2</sub> before the boundary (Courtillet et al., 1986; Tobin  
266 et al., 2017 and sources cited within) and therefore the CO<sub>2</sub> spike we report may not be  
267 contributed entirely by the bolide-impact.

268 The Chicxulub bolide impact would release CO<sub>2</sub> almost instantaneously via the  
269 vaporization of target carbonate bedrock (Artemieva and Morgan, 2017; O'Keefe and Ahrens,  
270 1989) and wildfires (Durda and Kring, 2004; Wolbach et al., 1990). A recent model for the  
271 vaporization of target carbonate bedrock at Chicxulub suggests a modest 54 ppm rise in

272 atmospheric CO<sub>2</sub> (Artemieva et al., 2017). Global wildfires may have caused CO<sub>2</sub> to increase by  
273 315 ppm (Toon et al., 2016), but the extent of these fires is contentious and may have been far  
274 less (Belcher et al., 2003, 2004, 2005, 2009, 2015; Belcher, 2009; Harvey et al., 2008; Morgan et  
275 al. 2013).

276         Establishing a link between Deccan volcanism and CO<sub>2</sub> change at the K-Pg boundary is  
277 difficult because: 1) age uncertainties of the lava flows are on the order of 10<sup>4</sup>-10<sup>5</sup> yrs (e.g.,  
278 Renne et al., 2015; Schoene et al., 2015; Schoene et al., 2019; Sprain et al., 2019); and 2)  
279 constraining the amount and rate of CO<sub>2</sub> release is challenging (Jay and Widdowson, 2008; Self  
280 et al., 2006). Deccan volcanism clearly brackets the K-Pg boundary, but whether there was a  
281 pulse of activity within 10<sup>2</sup>-10<sup>3</sup> yrs of the boundary is unresolved (Schoene et al., 2019; Sprain et  
282 al., 2019). Using existing constraints on the magnitude and pacing of CO<sub>2</sub> release for the Deccan,  
283 Tobin et al. (2017) demonstrate that it is possible, in principle, to raise CO<sub>2</sub> concentrations by  
284 several hundred ppm. Future work may provide clarity.

285         Temperature records spanning the first 10<sup>2</sup>-10<sup>3</sup> yrs after the K-Pg boundary are sparse,  
286 but most modeling and high resolution marine data are not consistent with a large change in CO<sub>2</sub>.  
287 After a brief “impact winter” (months to decades; Bardeen et al., 2017; Brugger et al., 2017;  
288 Taylor et al., 2018; Vellekoop et al., 2014, 2015, 2016), temperatures increased between ~1-6 °C  
289 depending on paleolatitude and geographic location, with the largest increases often at higher  
290 paleolatitudes (Macleod et al., 2018; Taylor et al., 2018; Vellekoop et al., 2014; Zhang et al.,  
291 2018). Terrestrial temperature trends inferred from leaf fossils are somewhat ambiguous and  
292 model dependent (Upchurch et al., 2007). Among marine records and most relevant to our study,  
293 Taylor et al. (2018) document a 2.5-4 °C warming during the fern spike interval in the southern  
294 mid-latitudes (present-day New Zealand). Together, these reconstructions best fit a scenario with

295 a modest 1-3 °C rise in global mean surface temperature. If we assume an Earth-system  
296 sensitivity of 3 °C or higher per CO<sub>2</sub> doubling (Royer 2016), these records imply—at most—one  
297 CO<sub>2</sub> doubling. One exception is a ~5 °C warming within ~100,000 yrs after the K-Pg boundary  
298 at the global stratotype El Kef, Tunisia (~20 °N paleolatitude; MacLeod et al., 2018). This  
299 subtropical temperature record appears incompatible with our record, suggesting that either CO<sub>2</sub>  
300 directly before the K-Pg boundary was substantially lower (<400 ppm) than what our and most  
301 other reconstructions imply (Zhang et al., 2018; see also Figure S17) or local changes in ocean  
302 chemistry biased the temperature estimates.

303 In summary, we find no strong evidence for a large pulse of atmospheric CO<sub>2</sub> coincident  
304 with the K-Pg boundary. Our CO<sub>2</sub> record from within or directly above the fern spike is most  
305 consistent with a CO<sub>2</sub> rise of no more than ~500 ppm and more likely ~250 ppm or less. This is  
306 in keeping with the balance of evidence from temperature records and from the carbon cycle  
307 modeling of impact vaporization of target bedrock, widespread wildfire, and Deccan volcanism.

### 308 **Acknowledgements**

309 We thank S. Sultan for use of her LI-COR gas-exchange analyzer, T. Ku for providing  
310 laboratory space, and D. Penman and one anonymous reviewer for helpful comments. Data used  
311 in this study is available in the Supplementary Information and DatasetSI.

312 **References**

- 313 Alroy, J. (2008). Dynamics of origination and extinction in the marine fossil record, *Proceedings*  
 314 *of the National Academy of Sciences USA*, *105*, 11536-11542.  
 315 <https://doi.org/10.1073/pnas.08025971105>
- 316 Archer, D. (2005). Fate of fossil fuel CO<sub>2</sub> in geologic time, *Journal of Geophysical Research*,  
 317 *110*, C09S05. <https://doi.org/10.1029/2004JC002625>
- 318 Arens, N. C., & Jahren, A. H. (2000). Carbon isotope excursion in atmospheric CO<sub>2</sub> at the  
 319 Cretaceous-Tertiary boundary: evidence from terrestrial sediments, *Palaios*, *15*, 314-322.  
 320 [https://doi.org/10.1669/0883-1351\(2000\)015<0314:CIEIAC>2.0.CO;2](https://doi.org/10.1669/0883-1351(2000)015<0314:CIEIAC>2.0.CO;2)
- 321 Artemieva, N., & Morgan, J. (2017). Quantifying the release of climate-active gases by large  
 322 meteorite impacts with a case study of Chicxulub, *Geophysical Research Letters*, *44*, 10-  
 323 188. <https://doi.org/10.1002/2017GL074879>
- 324 Barclay, R. S., & Wing, S. L. (2016). Improving the *Ginkgo* CO<sub>2</sub> barometer: implications for the  
 325 early Cenozoic atmosphere, *Earth and Planetary Science Letters*, *439*, 158-171.  
 326 <https://doi.org/10.1016/j.epsl.2016.01.012>
- 327 Bardeen, C. G., Garcia, R. R., Toon, O. B., & Conley, A. J. (2017). On transient climate change  
 328 at the Cretaceous– Paleogene boundary due to atmospheric soot injections. *Proceedings*  
 329 *of the National Academy of Sciences USA*, 201708980.  
 330 <https://doi.org/10.1073/pnas.1708980114>
- 331 Barnett, J. S., Littler, K., Kroon, D., Leng, M. J., Westerhold, T., Röhl, U., & Zachos, J. C.  
 332 (2017). A new high-resolution chronology for the late Maastrichtian warming event:  
 333 Establishing robust temporal links with the onset of Deccan volcanism, *Geology*, *46*, 147-  
 334 150. <https://doi.org/10.1130/G39771.1>
- 335 Barral, A., Gomez, B., Legendre, S., & Lécuyer, C. (2017). Evolution of the carbon isotope  
 336 composition of atmospheric CO<sub>2</sub> throughout the Cretaceous, *Palaeogeography,*  
 337 *Palaeoclimatology, Palaeoecology*, *471*, 40-47.  
 338 <https://doi.org/10.1016/j.palaeo.2017.01.034>
- 339 Belcher, C. M. (2009). Reigniting the Cretaceous-Paleogene firestorm debate, *Geology*, *37*,  
 340 1147–1148. <https://doi.org/10.1130/focus122009.1>
- 341 Belcher, C. M., Collinson, M. E., Sweet, A. R., Hildebrand, A. R., & Scott, A. C. (2003).  
 342 Fireball passes and nothing burns – The role of thermal radiation in the Cretaceous–  
 343 Tertiary event: Evidence from the charcoal record of North America, *Geology*, *31*, 1061–  
 344 1064. <https://doi.org/10.1130/G19989.1>
- 345 Belcher, C. M., Collinson, M. E., Sweet, A. R., Hildebrand, A. R., & Scott, A. C. (2004).  
 346 Fireball passes and nothing burns – The role of thermal radiation in the Cretaceous-  
 347 Tertiary event: Evidence from the charcoal record of North America: Comment and  
 348 Reply: REPLY, *Geology*, *32*, e50–e51. <https://doi.org/10.1130/0091-7613-32.1.e51>
- 349 Belcher, C. M., Collinson, M. E., & Scott, A. C. (2005). Constraints on the thermal energy  
 350 released from the Chicxulub impactor: New evidence from multimethod charcoal  
 351 analysis, *Journal of the Geological Society, London*, *162*, 591–602.  
 352 <https://doi.org/10.1144/0016-764904-104>
- 353 Belcher, C. M., Finch, P., Collinson, M. E., Scott, A. C., & Grassineau, N. V. (2009).  
 354 Geochemical evidence for combustion of hydrocarbons during the K-T impact event,  
 355 *Proceedings of the National Academy of Sciences USA*, *106*, 4112–4117.  
 356 <https://doi.org/10.1073/pnas.08131171106>

- 357 Belcher, C. M., Hadden, R. M., Rein, G., Morgan, J. V., Artemieva, N., & Goldin, T. (2015). An  
 358 experimental assessment of the ignition of forest fuels by the thermal pulse generated by  
 359 the Cretaceous–Palaeogene impact at Chicxulub, *Journal of the Geological Society,*  
 360 *London, 172,* 175–185. <https://doi.org/10.1144/jgs2014-082>
- 361 Beerling, D. J., Fox, A., & Anderson, C. W. (2009). Quantitative uncertainty analyses of ancient  
 362 atmospheric CO<sub>2</sub> estimates from fossil leaves, *American Journal of Science, 309,* 775-  
 363 787. <https://doi.org/10.2475/09.2009.01>
- 364 Beerling, D. J., Lomax, B. H., Royer, D. L., Upchurch, G. R., & Kump, L. R. (2002). An  
 365 atmospheric CO<sub>2</sub> reconstruction across the Cretaceous-Tertiary boundary from leaf  
 366 megafossils, *Proceedings of the National Academy of Sciences USA, 99,* 7836-7840,  
 367 <https://doi.org/10.1073/pnas.122573099>
- 368 Beerling, D. J., Lomax, B. H., Upchurch, G. R., Nichols, D. J., Pillmore, C. L., Handley, L. L., &  
 369 Scrimgeour, C. M. (2001). Evidence for the recovery of terrestrial ecosystems ahead of  
 370 marine primary production following a biotic crisis at the Cretaceous–Tertiary boundary,  
 371 *Journal of the Geological Society, London, 158,* 737-740.  
 372 <https://doi.org/10.1144/jgs.158.5.737>
- 373 Berry, J.A. & Björkman, O. (1980). Photosynthetic response and adaptation to temperature in  
 374 higher plants, *Annual Review of Plant Physiology, 31,* 491–543.  
 375 <https://doi.org/10.1146/annurev.pp.31.060180.002423>
- 376 Breecker, D., & Retallack, G. (2014). Refining the pedogenic carbonate atmospheric CO<sub>2</sub> proxy  
 377 and application to Miocene CO<sub>2</sub>, *Palaeogeography, Palaeoclimatology, Palaeoecology,*  
 378 *406,* 1-8. <https://doi.org/10.1016/j.palaeo.2014.04.012>
- 379 Breecker, D. O., Sharp, Z. D., & McFadden, L. D. (2009). Seasonal bias in the formation and  
 380 stable isotopic composition of pedogenic carbonate in modern soils from central New  
 381 Mexico, USA, *Geological Society of America Bulletin, 121,* 630-640.  
 382 <https://doi.org/10.1130/B26413.1>
- 383 Brugger, J., Feulner, G., & Petri, S. (2017). Baby, it's cold outside: Climate model simulations of  
 384 the effects of the asteroid impact at the end of the Cretaceous, *Geophysical Research*  
 385 *Letters, 44,* 419-427. <https://doi.org/10.1002/2016GL072241>
- 386 Brusatte, S. L., Butler, R. J., Barrett, P. M., Carrano, M. T., Evans, D. C., Lloyd, G. T., et al.  
 387 (2015). The extinction of the dinosaurs, *Biological Reviews, 90,* 628-642,  
 388 <https://doi.org/10.1111/brv.12128>
- 389 Clyde, W. C., Ramezani, J., Johnson, K. R., Bowring, S. A., & Jones, M. M. (2016). Direct high-  
 390 precision U–Pb geochronology of the end-Cretaceous extinction and calibration of  
 391 Paleocene astronomical timescales, *Earth and Planetary Science Letters, 452,* 272-280.  
 392 <https://doi.org/10.1016/j.epsl.2016.07.041>
- 393 Colbourn, G., Ridgwell, A., & Lenton, T. M. (2015). The time scale of the silicate weathering  
 394 negative feedback on atmospheric CO<sub>2</sub>, *Global Biogeochemical Cycles, 29,* 583-596.  
 395 <https://doi.org/10.1002/2014GB005054>
- 396 Courtillot, V., Besse, J., Vandamme, D., Montigny, R., Jaeger, J. J., & Cappetta, H. (1986).  
 397 Deccan flood basalts at the Cretaceous/Tertiary boundary?, *Earth and Planetary Science*  
 398 *Letters, 80,* 361-374. [https://doi.org/10.1016/0012-821X\(86\)90118-4](https://doi.org/10.1016/0012-821X(86)90118-4)
- 399 Doria, G., Royer, D. L., Wolfe, A. P., Fox, A., Westgate, J. A., & Beerling, D. J. (2011).  
 400 Declining atmospheric CO<sub>2</sub> during the late Middle Eocene climate transition, *American*  
 401 *Journal of Science, 311,* 63-75. <https://doi.org/10.2475/01.2011.03>

- 402 Durda, D. D., & Kring, D. A. (2004). Ignition threshold for impact-generated fires, *Journal of*  
403 *Geophysical Research*, *109*, E08004. <https://doi.org/10.1029/2004JE002279>
- 404 Ekart, D. D., Cerling, T. E., Montanez, I. P., & Tabor, N. J. (1999). A 400 million year carbon  
405 isotope record of pedogenic carbonate: implications for paleoatmospheric carbon dioxide,  
406 *American Journal of Science*, *299*, 805-827. <https://doi.org/10.2475/ajs.299.10.805>
- 407 Farquhar, G. D., & Sharkey, T. D. (1982). Stomatal conductance and photosynthesis, *Annual*  
408 *Review of Plant Physiology*, *33*, 317-345.  
409 <https://doi.org/10.1146/annurev.pp.33.060182.001533>
- 410 Franks, P. J., Royer, D. L., Beerling, D. J., Van de Water, P. K., Cantrill, D. J., Barbour, M. M.,  
411 & Berry, J. A. (2014). New constraints on atmospheric CO<sub>2</sub> concentration for the  
412 Phanerozoic, *Geophysical Research Letters*, *41*, 4685-4694.  
413 <https://doi.org/10.1002/2014GL060457>
- 414 Gardner, R. O. (1975). An overview of botanical clearing technique, *Stain Technology*, *50*, 99-  
415 105. <https://doi.org/10.3109/10520297509117042>
- 416 Gradstein, F. M., Ogg, J. G., Schmitz, M., & Ogg, G. (2012). *The Geologic Time Scale 2012*,  
417 Elsevier.
- 418 Harvey, M. C., Brassell, S. C., Belcher, C. M., & Montanari, A., (2008). Combustion of fossil  
419 organic matter at the Cretaceous-Paleogene (K-P) boundary, *Geology*, *36*, 355–358.  
420 <https://doi.org/10.1130/G24646A.1>
- 421 Henehan, M. J., Rae, J. W., Foster, G. L., Erez, J., Prentice, K. C., Kucera, M., et al. (2013).  
422 Calibration of the boron isotope proxy in the planktonic foraminifera *Globigerinoides*  
423 *ruber* for use in palaeo-CO<sub>2</sub> reconstruction, *Earth and Planetary Science Letters*, *364*,  
424 111-122. <https://doi.org/10.1016/j.epsl.2012.12.029>
- 425 Helliker, B. R. & Richter, S. L., (2008) Subtropical to boreal convergence of tree-leaf  
426 temperatures, *Nature*, *454*, 511-514. <https://doi.org/10.1038/nature07031>
- 427 Hicks, J. F., Johnson, K. R., Obradovich, J. D., Tauxe, L., & Clark, D. (2002).  
428 Magnetostratigraphy and geochronology of the Hell Creek and basal Fort Union  
429 Formations of southwestern North Dakota and a recalibration of the age of the  
430 Cretaceous-Tertiary boundary, in Hartman, J., Johnson, K.R., Nichols, D.J., eds., *The*  
431 *Hell Creek Formation and the Cretaceous-Tertiary Boundary in the northern Great Plains:*  
432 *Geological Society of America Special Paper* 361, 35-55.
- 433 Hincke, A. J., Broere, T., Kürschner, W. M., Donders, T. H., & Wagner-Cremer, F. (2016).  
434 Multi-year leaf-level response to sub-ambient and elevated experimental CO<sub>2</sub> in *Betula*  
435 *nana*, *PloS ONE*, *11*, e0157400. <https://doi.org/10.1371/journal.pone.0157400>
- 436 Hönisch, B., & Hemming, N. G. (2005). Surface ocean pH response to variations in pCO<sub>2</sub>  
437 through two full glacial cycles, *Earth and Planetary Science Letters*, *236*, 305-314.  
438 <https://doi.org/10.1016/j.epsl.2005.04.027>
- 439 Huang, C., Retallack, G. J., Wang, C., & Huang, Q. (2013). Paleoatmospheric pCO<sub>2</sub> fluctuations  
440 across the Cretaceous–Tertiary boundary recorded from paleosol carbonates in NE China,  
441 *Palaeogeography, Palaeoclimatology, Palaeoecology*, *385*, 95-105,  
442 <https://doi.org/10.1016/j.palaeo.2013.01.005>
- 443 Jay, A. E., & Widdowson, M. (2008). Stratigraphy, structure and volcanology of the SE Deccan  
444 continental flood basalt province: implications for eruptive extent and volumes, *Journal*  
445 *of the Geological Society, London*, *165*, 177-188. [https://doi.org/10.1144/0016-](https://doi.org/10.1144/0016-76492006-062)  
446 [76492006-062](https://doi.org/10.1144/0016-76492006-062)

- 447 Johnson, K. R. (2002). Megafloora of the Hell Creek and lower Fort Union Formations in the  
 448 western Dakotas: Vegetational response to climate change, the Cretaceous-Tertiary  
 449 boundary event, and rapid marine transgression, in Hartman, J., Johnson, and K.R., N.,  
 450 D.J., eds., *The Hell Creek Formation and the Cretaceous-Tertiary Boundary in the*  
 451 *northern Great Plains: Geological Society of America Special Paper 361*, 329-391.  
 452 <https://doi.org/10.1130/0-8137-2361-2.329>
- 453 Konrad, W., Katul, G., Roth-Nebelsick, A., & Grein, M. (2017). A reduced order model to  
 454 analytically infer atmospheric CO<sub>2</sub> concentration from stomatal and climate data,  
 455 *Advances in Water Resources*, *104*, 145-157.  
 456 <https://doi.org/10.1016/j.advwatres.2017.03.018>
- 457 Konrad, W., Roth-Nebelsick, A., & Grein, M. (2008). Modeling of stomatal density response to  
 458 atmospheric CO<sub>2</sub>, *Journal of Theoretical Biology*, *253*, 638-658.  
 459 <https://doi.org/10.1016/j.jtbi.2008.03.032>
- 460 Kowalczyk, J. B., Royer, D. L., Miller, I. M., Anderson, C. W., Beerling, D. J., Franks, P. J., et  
 461 al. (2018). Multiple proxy estimates of atmospheric CO<sub>2</sub> from an early Paleocene  
 462 rainforest, *Paleoceanography and Paleoclimatology*, *13*, 1427-1438.  
 463 <https://doi.org/10.1029/2018PA003356>
- 464 Leslie, C. E., Peppe, D. J., Williamson, T. E., Heizler, M., Jackson, M., Atchley, S. C., et al.  
 465 (2018). Revised age constraints for Late Cretaceous to early Paleocene terrestrial strata  
 466 from the Dawson Creek section, Big Bend National Park, west Texas, *Geological Society*  
 467 *of America Bulletin*. <https://doi.org/10.1130/B31785.1>
- 468 Londoño, L., Royer, D.L., Jaramillo, C., Escobar, J., Foster, D.A., Cárdenas-Rozo, A.L., et al.  
 469 (2018). Early Miocene CO<sub>2</sub> estimates from a Neotropical fossil assemblage exceed 400  
 470 ppm, *American Journal of Botany*, *105*, p. 1929-1937. <https://doi.org/10.1002/ajb2.1187>
- 471 MacLeod, K. G., Quinton, P. C., Sepúlveda, J., & Negra, M. H. (2018). Postimpact earliest  
 472 Paleogene warming shown by fish debris oxygen isotopes (El Kef, Tunisia), *Science*,  
 473 *360*, 1467–1469. <https://doi.org/10.1126/science.aap8525>
- 474 Martínez, C., Gandolfo, M. A., & Cúneo, N. R. (2018). Angiosperm leaves and cuticles from the  
 475 uppermost Cretaceous of Patagonia, biogeographic implications and atmospheric paleo-  
 476 CO<sub>2</sub> estimates, *Cretaceous Research*, *89*, 107-118.  
 477 <https://doi.org/10.1016/j.cretres.2018.03.015>
- 478 Maruoka, T., Koeberl, C., & Bohor, B. F. (2007). Carbon isotopic compositions of organic  
 479 matter across continental Cretaceous–Tertiary (K–T) boundary sections: Implications for  
 480 paleoenvironment after the K–T impact event, *Earth and Planetary Science Letters*, *253*,  
 481 226-238. <https://doi.org/10.1016/j.epsl.2006.10.028>
- 482 Maxbauer, D. P., Royer, D. L., & LePage, B. A. (2014). High Arctic forests during the middle  
 483 Eocene supported by moderate levels of atmospheric CO<sub>2</sub>, *Geology*, *42*, 1027-1030.  
 484 <https://doi.org/10.1130/G36014.1>
- 485 McElwain, J. C., Montañez, I., White, J. D., Wilson, J. P., & Yiotis, C., (2016). Was atmospheric  
 486 CO<sub>2</sub> capped at 1000 ppm over the past 300 million years?, *Palaeogeography,*  
 487 *Palaeoclimatology, Palaeoecology*, *441*, 653-658.  
 488 <https://doi.org/10.1016/j.palaeo.2015.10.017>
- 489 McElwain, J. C., & Punyasena, S. W. (2007). Mass extinction events and the plant fossil record,  
 490 *Trends in Ecology & Evolution*, *22*, 548-557. <https://doi.org/10.1016/j.tree.2007.09.003>



- 491 Michaletz, S. T., Weiser, M. D., McDowell, N. G., Zhou, J., Kaspari, M., Helliker, B. R., et al.  
 492 (2016). The energetic and carbon economic origins of leaf thermoregulation, *Nature*  
 493 *Plants*, 2, 16129. <https://doi.org/10.1038/nplants.2016.129>
- 494 Michaletz, S. T., Weiser, M. D., Zhou, J., Kaspari, M., Helliker, B. R., and Enquist, B. J. (2015)  
 495 Plant thermoregulation: energetics, trait-environment interactions, and carbon economics,  
 496 *Trends in Ecology & Evolution*, 30, 714-724. <https://doi.org/10.1016/j.tree.2015.09.006>
- 497 Montañez, I. P., McElwain, J. C., Poulsen, C. J., White, J. D., DiMichele, W. A., Wilson, J. P., et  
 498 al. (2016). Climate, pCO<sub>2</sub> and terrestrial carbon cycle linkages during late Palaeozoic  
 499 glacial–interglacial cycles, *Nature Geoscience*, 9, 824. <https://doi.org/10.1038/ngeo2822>
- 500 Montañez, I. P., Norris, R. D., Algeo, T., Chandler, M. A., Johnson, K. R., Kennedy, M. J., et al.  
 501 (2011). *Understanding Earth's Deep Past: Lessons for our Climate Future*, 194 pp.,  
 502 National Academies Press, Washington, D.C.
- 503 Morgan, J. V., Artemieva, N., & Goldin, T. (2013). Revisiting wildfires at the K–Pg boundary.  
 504 *Journal of Geophysical Research*, 118, 1508–1520.  
 505 <https://doi.org/10.1002/2013JG002428>
- 506 Nordt, L., Atchley, S., & Dworkin, S. (2002). Paleosol barometer indicates extreme fluctuations  
 507 in atmospheric CO<sub>2</sub> across the Cretaceous-Tertiary boundary, *Geology*, 30, 703-706.  
 508 [https://doi.org/10.1130/0091-7613\(2002\)030<0703:PBIEFI>2.0.CO;2](https://doi.org/10.1130/0091-7613(2002)030<0703:PBIEFI>2.0.CO;2)
- 509 Nordt, L., Atchley, S., & Dworkin, S. (2003). Terrestrial evidence for two greenhouse events in  
 510 the latest Cretaceous, *GSA Today*, 13(12), 4-9. [https://doi.org/10.1130/1052-](https://doi.org/10.1130/1052-5173(2003)013<4:TEFTGE>2.0.CO;2)  
 511 [5173\(2003\)013<4:TEFTGE>2.0.CO;2](https://doi.org/10.1130/1052-5173(2003)013<4:TEFTGE>2.0.CO;2)
- 512 O'Keefe, J. D., & Ahrens, T. J. (1989). Impact production of CO<sub>2</sub> by the Cretaceous/Tertiary  
 513 extinction bolide and the resultant heating of the Earth, *Nature*, 338, 247,  
 514 <https://doi.org/10.1038/338247a0>
- 515 Pagani, M. (2002). The alkenone-CO<sub>2</sub> proxy and ancient atmospheric carbon dioxide,  
 516 *Philosophical Transactions of the Royal Society of London A*, 360, 609-632.  
 517 <https://doi.org/10.1098/rsta.2001.0959>
- 518 Petersen, S. V., Dutton, A., & Lohmann, K. C. (2016). End-Cretaceous extinction in Antarctica  
 519 linked to both Deccan volcanism and meteorite impact via climate change, *Nature*  
 520 *Communications*, 7, 12079. <https://doi.org/10.1038/ncomms12079>
- 521 Porter, A. S., Gerald, C. E.-F., McElwain, J. C., Yiotis, C., & Elliott-Kingston, C. (2015). How  
 522 well do you know your growth chambers? Testing for chamber effect using plant traits:  
 523 *Plant Methods*, 11-40, <https://doi.org/10.1186/s13007-015-0088-0>
- 524 R Core Team (2018). R: A language and environment for statistical computing. Vienna, Austria:  
 525 R Foundation for Statistical Computing. Retrieved from <https://www.r-project.org/>
- 526 Raup, D. M., & Sepkoski J. J. (1982). Mass extinctions in the marine fossil record, *Science*, 215,  
 527 1501-1503, <https://doi.org/10.1126/science.215.4539.1501>
- 528 Reichgelt, T., D'Andrea, W. J., & Fox, B. R. (2016). Abrupt plant physiological changes in  
 529 southern New Zealand at the termination of the Mi-1 event reflect shifts in hydroclimate  
 530 and pCO<sub>2</sub>, *Earth and Planetary Science Letters*, 455, 115-124.  
 531 <https://doi.org/10.1016/j.epsl.2016.09.026>
- 532 Renne, P. R., Deino, A. L., Hilgen, F. J., Kuiper, K. F., Mark, D. F., Mitchell, W. S. et al. (2013).  
 533 Time scales of critical events around the Cretaceous-Paleogene boundary, *Science*, 339,  
 534 684-687. <https://doi.org/10.1126/science.1230492>.

- 535 Renne, P. R., Sprain, C. J., Richards, M. A., Self, S., Vanderkluyzen, L. & Pande, K. (2015).  
 536 State shift in Deccan volcanism at the Cretaceous-Paleogene boundary, possibly induced  
 537 by impact, *Science*, 350, 76-78. <https://doi.org/10.1126/science.aac7549>
- 538 Richards, M. A., Alvarez, W., Self, S., Karlstrom, L., Renne, P. R., Manga, M., et al. (2015).  
 539 Triggering of the largest Deccan eruptions by the Chicxulub impact, *Geological Society*  
 540 *of America Bulletin.*, 127, 1507-1520. <https://doi.org/10.1130/B31167.1>
- 541 Richey, J. D., Upchurch, G. R., Montañez, I. P., Lomax, B. H., Suarez, M. B., Crout, N. M. et al.  
 542 (2018). Changes in CO<sub>2</sub> during Ocean Anoxic Event 1d indicate similarities to other  
 543 carbon cycle perturbations, *Earth and Planetary Science Letters*, 491, 172-182.  
 544 <https://doi.org/10.1016/j.epsl.2018.03.035>
- 545 Royer, D. L. (2001). Stomatal density and stomatal index as indicators of paleoatmospheric CO<sub>2</sub>  
 546 concentration, *Review of Palaeobotany and Palynology*, 114, 1-28.  
 547 [https://doi.org/10.1016/S0034-6667\(00\)00074-9](https://doi.org/10.1016/S0034-6667(00)00074-9)
- 548 Royer, D. L. (2014). Atmospheric CO<sub>2</sub> and O<sub>2</sub> during the Phanerozoic: tools, patterns, and  
 549 impacts, *Geochemistry Treatise*, 2, 251-267. [http://dx.doi.org/10.1016/B978-0-08-](http://dx.doi.org/10.1016/B978-0-08-095975-7.01311-5)  
 550 [095975-7.01311-5](http://dx.doi.org/10.1016/B978-0-08-095975-7.01311-5)
- 551 Royer D. L. (2016). Climate sensitivity in the geologic past. *Annual Review of Earth and*  
 552 *Planetary Sciences*, 44, 277-293. <https://doi.org/10.1146/annurev-earth-100815-024150>
- 553 Royer, D. L., & Hren, M. T. (2017). Carbon isotopic fractionation between whole leaves and  
 554 cuticle, *Palaios*, 32, 199-205. <https://doi.org/10.2110/palo.2016.073>
- 555 Royer, D. L., Moynihan, K. M., McKee, M. L., Londoño, L., & Franks, P. J. (in review, 2018).  
 556 Sensitivity of a leaf gas-exchange model for estimating paleoatmospheric CO<sub>2</sub>  
 557 concentration, *Clim. Past Discuss.* <https://doi.org/10.5194/cp-2018-156>
- 558 Self, S., Widdowson, M., Thordarson, T., & Jay, A. E. (2006). Volatile fluxes during flood basalt  
 559 eruptions and potential effects on the global environment: A Deccan perspective, *Earth*  
 560 *and Planetary Science Letters*, 248, 518-532. <https://doi.org/10.1016/j.epsl.2006.05.041>
- 561 Schimmelmann, A., & DeNiro, M. J. (1984). Elemental and stable isotope variations of organic  
 562 matter from a terrestrial sequence containing the Cretaceous/Tertiary boundary at York  
 563 Canyon, New Mexico, *Earth and Planetary Science Letters*, 68, 392-398  
 564 [https://doi.org/10.1016/0012-821X\(84\)90124-9](https://doi.org/10.1016/0012-821X(84)90124-9)
- 565 Schaller, M. F., Wright, J. D., & Kent, D. V. (2011). Atmospheric pCO<sub>2</sub> Perturbations  
 566 Associated with the Central Atlantic Magmatic Province, *Science*, 331, 1404-1409,  
 567 <https://doi.org/10.1126/science.1199011>
- 568 Schoene, B., Eddy, M. P., Samperton, K. M., Keller, C. B., Keller, G., Adatte, T., & Khadri, S.  
 569 F. R. (2019). U-Pb constraints on pulsed eruption of the Deccan Traps across the end-  
 570 Cretaceous mass extinction, *Science*, 363, 862-866.  
 571 <https://doi.org/10.1126/science.aau2422>
- 572 Schoene, B., Samperton, K. M., Eddy, M. P., Keller, G., Adatte, T., Bowring, S. A., et al. (2015).  
 573 U-Pb geochronology of the Deccan Traps and relation to the end-Cretaceous mass  
 574 extinction, *Science*, 347, 182-184, <https://doi.org/10.1126/science.aaa0118>
- 575 Schulte, P., Alegret, L., Arenillas, I., Arz, J. A., Barton, P. J., Bown, P. R., et al. (2010). The  
 576 Chicxulub asteroid impact and mass extinction at the Cretaceous-Paleogene boundary,  
 577 *Science*, 327, 1214-1218. <https://doi.org/10.1126/science.1177265>
- 578 Solomon, S., Plattner, G.-K., Knutti, R., & Friedlingstein, P. (2009). Irreversible climate change  
 579 due to carbon dioxide emissions, *Proceedings of the National Academy of Sciences USA*,  
 580 106, 1704-1709. <https://doi.org/10.1073/pnas.0812721106>

- 581 Song, X., Barbour, M. M., Saurer, M., & Helliker, B. R. (2011). Examining the large-scale  
582 convergence of photosynthesis-weighted tree leaf temperatures through stable oxygen  
583 isotope analysis of multiple data sets, *New Phytologist*, 192, 912-924.  
584 <https://doi.org/10.1111/j.1469-8137.2011.03851.x>
- 585 Sprain, C. J., Renne, P. R., Vanderkluysen, L., Pande, K., Self, S., & Mittal, T. (2019). The  
586 eruptive tempo of Deccan volcanism in relation to the Cretaceous-Paleogene boundary,  
587 *Science*, 363, 866-870. <https://doi.org/10.1126/science.aav1446>
- 588 Steinthorsdottir, M., Vajda, V., & Pole, M. (2016). Global trends of pCO<sub>2</sub> across the Cretaceous–  
589 Paleogene boundary supported by the first Southern Hemisphere stomatal proxy-based  
590 pCO<sub>2</sub> reconstruction, *Palaeogeography, Palaeoclimatology, Palaeoecology*, 464, 143-  
591 152. <https://doi.org/10.1016/j.palaeo.2016.04.033>
- 592 Taylor, K. W., Willumsen, P. S., Hollis, C. J., & Pancost, R. D. (2018). South Pacific evidence  
593 for the long-term climate impact of the Cretaceous/Paleogene boundary event. *Earth-*  
594 *Science Reviews*, 179, 287-302. <https://doi.org/10.1016/j.earscirev.2018.02.012>
- 595 Tesfamichael, T., Jacobs, B., Tabor, N., Michel, L., Currano, E., Feseha, M., et al. (2017).  
596 Settling the issue of “decoupling” between atmospheric carbon dioxide and global  
597 temperature: [CO<sub>2</sub>]<sub>atm</sub> reconstructions across the warming Paleogene-Neogene divide,  
598 *Geology*, 45, 999-1002. <https://doi.org/10.1130/G39048.1>
- 599 Tipple, B. J., Meyers, S. R., & Pagani, M. (2010). Carbon isotope ratio of Cenozoic CO<sub>2</sub>: A  
600 comparative evaluation of available geochemical proxies, *Paleoceanography*, 25,  
601 PA3202. <https://doi.org/10.1029/2009PA001851>
- 602 Tobin, T., Bitz, C. & Archer, D. (2017). Modeling climatic effects of carbon dioxide emissions  
603 from Deccan Traps Volcanic Eruptions around the Cretaceous–Paleogene boundary,  
604 *Palaeogeography, Palaeoclimatology, Palaeoecology*, 478, 139-148.  
605 <https://doi.org/10.1016/j.palaeo.2016.05.028>
- 606 Toon, O. B., Bardeen, C. & Garcia, R. (2016). Designing global climate and atmospheric  
607 chemistry simulations for 1 and 10 km diameter asteroid impacts using the properties of  
608 ejecta from the K-Pg impact, *Atmospheric Chemistry and Physics*, 16, 13185-13212.  
609 <https://doi.org/10.5194/acp-16-13185-2016>
- 610 Upchurch, G. R., Jr., Lomax, B. H., & Beerling, D. J. (2007). Paleobotanical Evidence for  
611 Climatic Change across the Cretaceous-Tertiary Boundary, North America: Twenty  
612 Years after Wolfe and Upchurch. In: Jarzen, David M., Manchester, Steven R. Retallack,  
613 Gregory J., and Jarzen, Susan A eds., *Advances in Angiosperm Paleobotany and*  
614 *Paleoclimatic Reconstruction: Contributions Honouring David L. Dilcher and Jack A.*  
615 *Wolfe. Courier Forschungsinstitut Senckenberg* 258: 57–74.
- 616 Vajda, V., Raine, J. I., & Hollis, C. J. (2001). Indication of global deforestation at the  
617 Cretaceous-Tertiary boundary by New Zealand fern spike, *Science*, 294, 1700-1702.  
618 <https://doi.org/10.1126/science.1064706>
- 619 Vellekoop, J., Esmeray-Senlet, S., Miller, K. G., Browning, J. V., Sluijs, A., van de  
620 Schootbrugge, et al. (2016). Evidence for Cretaceous-Paleogene boundary bolide “impact  
621 winter” conditions from New Jersey, USA. *Geology*, 44, 619-622.  
622 <https://doi.org/10.1130/G37961.1>
- 623 Vellekoop, J., Sluijs, A., Smit, J., Schouten, S., Weijers, J. W. H., Sinninghe Damsté, J. S., &  
624 Brinkhuis, H. (2014). Rapid short-term cooling following the Chicxulub impact at the  
625 Cretaceous–Paleogene boundary, *Proceedings of the National Academy of Sciences USA*,  
626 111, 7537-7541. <https://doi.org/10.1073/pnas.1319253111>

- 627 Vellekoop, J., Smit, J., van de Schootbrugge, B., Weijers, J. W., Galeotti, S., Damste, J. S. S., &  
628 Brinkhuis, H. (2015). Palynological evidence for prolonged cooling along the Tunisian  
629 continental shelf following the K–Pg boundary impact. *Palaeogeography,*  
630 *Palaeoclimatology, Palaeoecology*, 426, 216-228.  
631 <https://doi.org/10.1016/j.palaeo.2015.03.021>
- 632 Wilf, P., Johnson, K. R., & Huber, B. T. (2003). Correlated terrestrial and marine evidence for  
633 global climate changes before mass extinction at the Cretaceous–Paleogene boundary,  
634 *Proceedings of the National Academy of Sciences USA*, 100, 599-604.  
635 <https://doi.org/10.1073/pnas.0234701100>
- 636 Wing, S. L., Alroy, J., & Hickey, L. J. (1995). Plant and mammal diversity in the Paleocene to  
637 early Eocene of the Bighorn Basin, *Palaeogeography, Palaeoclimatology,*  
638 *Palaeoecology*, 115, 117-155. [https://doi.org/10.1016/0031-0182\(94\)00109-L](https://doi.org/10.1016/0031-0182(94)00109-L)
- 639 Wolbach, W. S., Anders, E., & Nazarov, M. A. (1990). Fires at the K/T boundary: Carbon at the  
640 Sumbar, Turkmenia, site, *Geochimica et Cosmochimica Acta*, 54, 1133-1146.  
641 [https://doi.org/10.1016/0016-7037\(90\)90444-P](https://doi.org/10.1016/0016-7037(90)90444-P)
- 642 Wolfe, A. P., Reyes, A. V., Royer, D. L., Greenwood, D. R., Doria, G., Gagen, M. H., et al.  
643 (2017). Middle Eocene CO<sub>2</sub> and climate reconstructed from the sediment fill of a  
644 subarctic kimberlite maar, *Geology*, 45, 619-622. <https://doi.org/10.1130/G39002.1>
- 645 Wolfe, J. A., & Upchurch, G. R. (1987). Leaf assemblages across the Cretaceous-Tertiary  
646 boundary in the Raton Basin, New Mexico and Colorado, *Proceedings of the National*  
647 *Academy of Sciences USA*, 84, 5096-5100. <https://doi.org/10.1073/pnas.84.15.5096>
- 648 Yamori, W., Hikosaka, K., & Way, D. A. (2014). Temperature response of photosynthesis in C<sub>3</sub>,  
649 C<sub>4</sub>, and CAM plants: temperature acclimation and temperature adaptation, *Photosynthesis*  
650 *Research*, 119, 101-117. <http://dx.doi.org/10.1007/s11120-013-9874-6>
- 651 Zeebe, R. E. (2013). Time-dependent climate sensitivity and the legacy of anthropogenic  
652 greenhouse gas emissions, *Proceedings of the National Academy of Sciences USA*, 110,  
653 13739-13744. <https://doi.org/10.1073/pnas.1222843110>
- 654 Zeebe, R. E., & Zachos, J. C. (2013). Long-term legacy of massive carbon input to the Earth  
655 system: Anthropocene versus Eocene, *Philosophical Transactions of the Royal Society A*,  
656 371, 1-17. <https://doi.org/10.1098/rsta.2012.0006>
- 657 Zhang, L., Wang, C., Wignall, P. B., Kluge, T., Wan, X., Wang, Q., & Gao, Y. (2018). Deccan  
658 volcanism caused coupled pCO<sub>2</sub> and terrestrial temperature rises, and pre-impact  
659 extinctions in northern China, *Geology*, 46, 271-274.  
660 <https://doi.org/10.1130/G39992.1>
- 661 Zhang, K., Zhao, Y., & Guo, X. (2011). Conifer stomata analysis in paleoecological studies on  
662 the Loess Plateau: An example from Tianchi Lake, Liupan Mountains, *Journal of Arid*  
663 *Environments*, 75, 1209-1213. <https://doi.org/10.1016/j.jaridenv.2011.04.023>

664

665 **Figure 1.** Atmospheric CO<sub>2</sub> estimates and probability density function using the leaf gas-  
666 exchange model of Franks et al. (2014) with *Cedrus deodara* (*C.d.*), *Osmundastrum*  
667 *cinnamomeum* (*O.c.*), and *Stenochlaena palustris* (*S.p.*), grown at two CO<sub>2</sub> treatments (500 and  
668 1000 ppm CO<sub>2</sub>). Dotted lines represent the target CO<sub>2</sub> concentrations. Estimates are the median  
669 and 95% confidence interval.

670

671 **Figure 2.** Measured inputs for *Cedrus deodara* (*C.d.*), *Osmundastrum cinnamomeum* (*O.c.*), and  
672 *Stenochlaena palustris* (*S.p.*) grown at two CO<sub>2</sub> concentrations (500 and 1000 ppm) and fossil  
673 *Ginkgo adiantoides* (*G.a.*) and aff. *Stenochlaena*. Abbreviations: K, Cretaceous; Pg, Paleogene.  
674 For multiple comparisons different letters indicate significantly different values at the 0.05 level.  
675 \* P ≤ 0.05, \*\* P ≤ 0.01, \*\*\* P ≤ 0.001.

676 **Figure 3.** Atmospheric CO<sub>2</sub> estimates from the Cretaceous-Paleogene boundary. Estimates from  
677 the leaf gas-exchange model (this study) are based on the same fossils whose stomatal index was  
678 used to estimate CO<sub>2</sub> by Beerling et al. (2002). The gray squares are based on the recommended  
679 values from Franks et al. (2014) for assimilation rate and the ratio of operational to maximum  
680 stomatal conductance. Error bars represent the 95% confidence interval.

Figure 1.

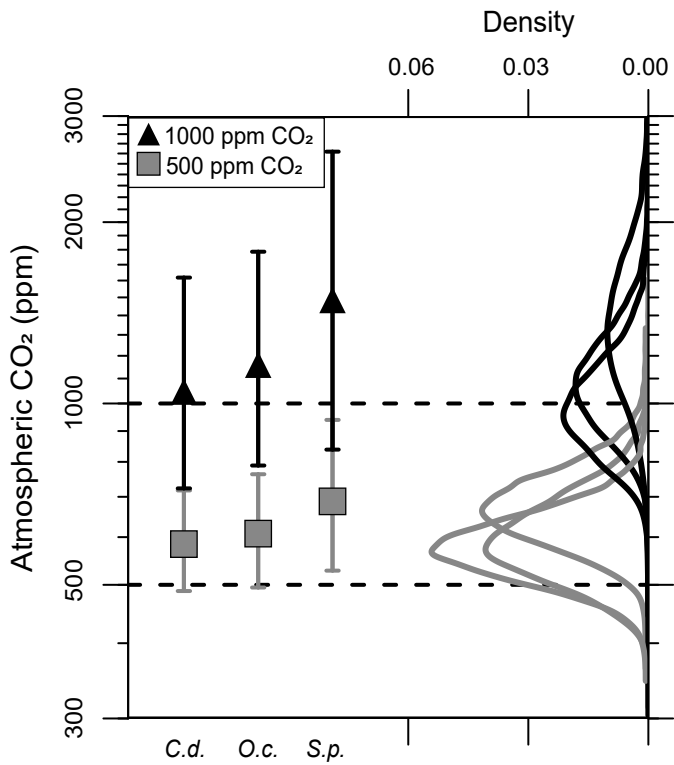

Figure 2.



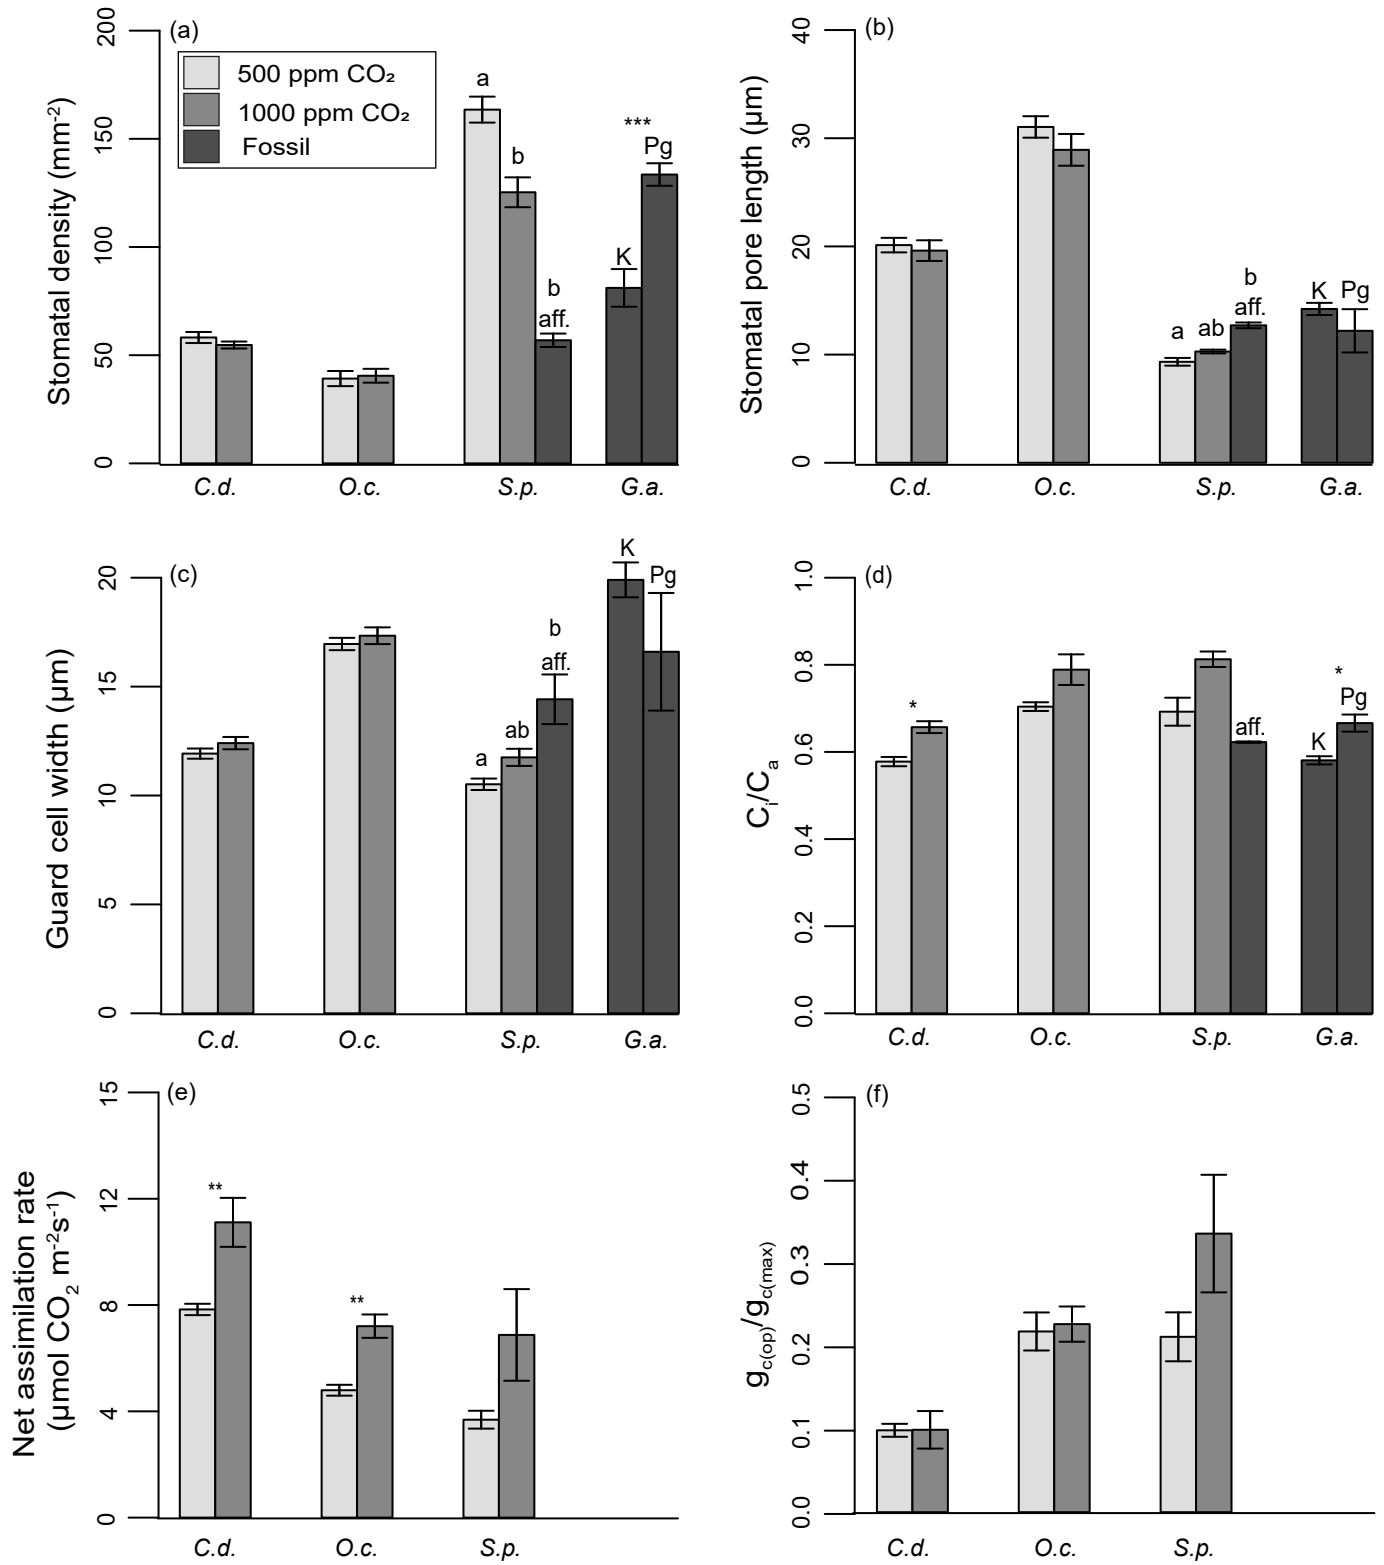

Figure 3.

Density

0.0050 0.0025 0.0000

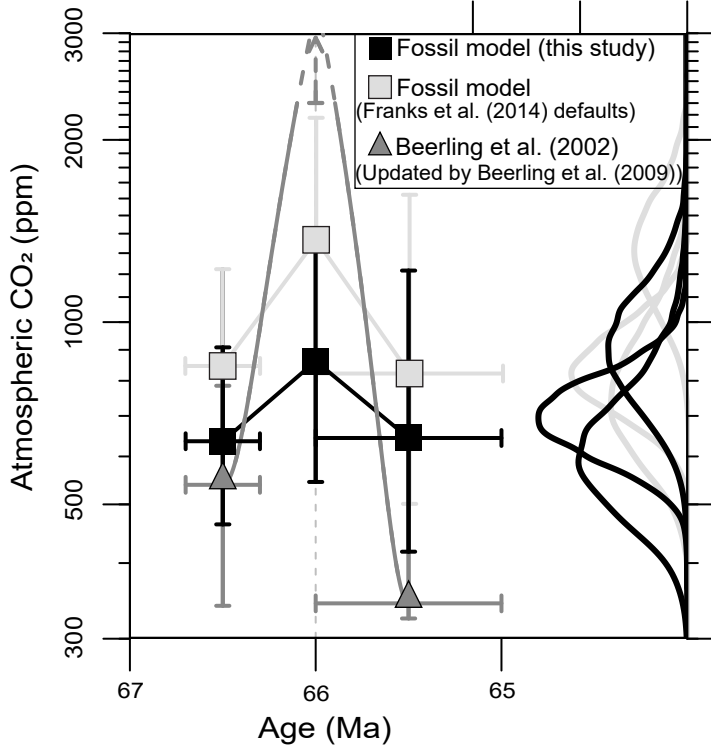

Supplement: Supplementary file [file cp-2018-156-AC1-supplement.pdf]
